# Supplementary material for: Body Mass Index, Interleukin-6 Signaling and Multiple Sclerosis: A Mendelian Randomization Study
Source: Front Immunol. 2022 Mar 21;13:834644. doi: 10.3389/fimmu.2022.834644 (PMC8978959; doi:10.3389/fimmu.2022.834644)
Supplement: Supplementary file 2 [file Table_1.xlsx]

## Sheet: S1
Supplementary Table 1: Details of datasetes included in the Mendelian randomization (MR) analyses
Phenotype	Participants	Source
Adult BMI (Yengo et al. PMID:30124842)	681275	https://portals.broadinstitute.org/collaboration/giant/images/c/c8/Meta-analysis_Locke_et_al%2BUKBiobank_2018_UPDATED.txt.gz N = 941 primary and secondary associations: https://portals.broadinstitute.org/collaboration/giant/images/e/e2/Meta-analysis_Locke_et_al%2BUKBiobank_2018_top_941_from_COJO_analysis_UPDATED.txt.gz
Adult BMI (Locke et al. PMID: 25673413)	322154	77 SNPs - Table 1 & Extended Data Table 2 in PMID 25673413
IL-6 signaling* (UK Biobank round 2, released 1st August 2018)	343524	UK Biobank: https://broad-ukb-sumstats-us-east-1.s3.amazonaws.com/round2/additive-tsvs/30710_raw.gwas.imputed_v3.both_sexes.tsv.bgz
IL-6 signaling* (CHARGE consortium, PMID: 30388399)	204402	Request to the Cohorts for Heart and Aging Research in Genomic Epidemiology (CHARGE) Inflammation Working Group (CIWG)
CRP (CHARGE consortium, PMID: 30388399)	204402	Request to the Cohorts for Heart and Aging Research in Genomic Epidemiology (CHARGE) Inflammation Working Group (CIWG)
IL-6 levels (CHARGE consortium, PMID: 33517400)	67428	Request to the CHARGE Inflammation Working Group (CIWG)
MS (PMID: 31604244)	41,505 (MS cases: 14,802; controls: 26,703)	discovery GWAS meta-analysis, request to the international Multiple Sclerosis Genetics Consortium (IMSGC)
BMI = body mass index
CRP = C-reactive protein
IL-6 = Interleukin-6
MS = multiple sclerosis
* CRP as downstream biomarker for IL6R signaling

## Sheet: S2
Supplementary Table 2: instrumental variables for genetically predicted BMI from Yengo et al. prior to clumping and data harmonisation (N=656)
SNP	Chromosome	Position	Effect allele	Other allele	Effect allele frequency	Beta	Standard error	P value	F statistic
rs12044597	1	1708801	A	G	0.4971	-0.0143	0.0016	1.7e-18	79.8789
rs7535528	1	2444414	A	G	0.3741	-0.0152	0.0018	1.4e-16	71.3086
rs6577584	1	6715390	T	G	0.6537	-0.0131	0.0018	3.7e-13	52.966
rs7556169	1	8741401	A	G	0.3857	-0.0103	0.0018	5.4e-09	32.7438
rs10779751	1	11284336	A	G	0.2744	0.0139	0.0018	2.5e-14	59.6327
rs761423	1	17301672	T	C	0.55	0.0113	0.0017	5.5e-11	44.1834
rs967605	1	23399932	T	C	0.8334	-0.0192	0.0023	1.7e-16	69.6862
rs785278	1	33307987	A	T	0.1771	-0.0159	0.0023	2.8e-12	47.7902
rs4653017	1	33776728	T	C	0.6818	0.0122	0.0018	4.5e-11	45.9383
rs9426003	1	34602870	A	G	0.2952	-0.0116	0.0019	1.4e-09	37.2742
rs11583122	1	38053458	T	C	0.07905	0.0182	0.003	7.4e-10	36.8044
rs2282231	1	39569571	T	C	0.2249	0.0165	0.0021	4.8e-15	61.7347
rs946526	1	46487168	T	C	0.04332	-0.0314	0.0043	1.7e-13	53.324
rs2275426	1	46487552	A	G	0.4338	0.0104	0.0016	2e-10	42.25
rs6700838	1	47700027	T	C	0.5959	-0.017	0.0017	2.5e-22	100
rs7531656	1	49828663	A	G	0.3246	0.0195	0.0017	7.4e-29	131.574
rs2356865	1	50836334	T	C	0.295	-0.0114	0.0019	1.6e-09	36
rs2481665	1	62594677	T	C	0.5592	0.0161	0.0016	7.2e-23	101.254
rs11208662	1	65987164	C	G	0.0884	0.0209	0.0031	2e-11	45.4537
rs7531118	1	72837239	T	C	0.4604	-0.0256	0.0016	3.6e-54	256
rs2590942	1	72885281	T	G	0.8165	0.0293	0.002	1.2e-46	214.623
rs12042908	1	74997762	A	G	0.4362	0.0184	0.0016	1.4e-29	132.25
rs12035349	1	77557339	A	G	0.8705	-0.0188	0.0026	1.1e-12	52.284
rs17391694	1	78623626	T	C	0.1189	0.0317	0.0025	7.5e-38	160.782
rs2154297	1	80791708	T	C	0.7121	-0.0115	0.0019	1.2e-09	36.6343
rs284227	1	82379446	T	C	0.7448	-0.0147	0.0019	3.5e-15	59.8587
rs6690764	1	92976590	A	G	0.7916	-0.0154	0.0022	6.3e-12	49
rs1973993	1	96943994	T	C	0.4096	-0.0208	0.0017	4.7e-33	149.702
rs2030342	1	97388226	T	C	0.5749	0.0143	0.0017	1.9e-16	70.7578
rs4372296	1	98320492	A	C	0.7714	-0.0133	0.002	7.6e-11	44.2225
rs1730859	1	107617707	A	G	0.6584	-0.0118	0.0017	1.1e-11	48.1799
rs12035149	1	107885018	C	G	0.777	-0.0146	0.0021	3.9e-12	48.3356
rs17531363	1	107977075	A	C	0.6967	0.0133	0.0019	2e-12	49
rs7550711	1	110082886	T	C	0.03058	0.0649	0.005	3.2e-38	168.48
rs12033257	1	112318484	A	G	0.6165	0.0146	0.0018	2.4e-15	65.7901
rs12731372	1	118852975	T	C	0.2322	0.0116	0.0019	1.2e-09	37.2742
rs10923724	1	119546842	T	C	0.5725	-0.0118	0.0016	6.4e-13	54.3906
rs6587552	1	151018861	A	G	0.2409	0.0173	0.002	1.6e-17	74.8225
rs905938	1	154991389	T	C	0.7325	-0.0149	0.0019	1.2e-15	61.4986
rs11577179	1	155983710	A	G	0.3721	-0.0108	0.0017	1.5e-10	40.3599
rs10733051	1	167280354	A	G	0.5198	0.0097	0.0016	2.9e-09	36.7539
rs12564992	1	174478100	A	G	0.8856	-0.0196	0.0026	5.3e-14	56.8284
rs6700816	1	174883994	A	T	0.96814	0.0345	0.0051	8.9e-12	45.7612
rs543874	1	177889480	A	G	0.8048	-0.0475	0.002	1.2e-122	564.062
rs10920678	1	190239907	A	G	0.4291	0.0155	0.0016	1.5e-21	93.8477
rs12041258	1	195047936	T	C	0.7713	0.0146	0.002	9.5e-13	53.29
rs10754210	1	197012111	A	G	0.3107	-0.0123	0.0018	3.2e-11	46.6944
rs2820311	1	201841476	A	G	0.6631	-0.0235	0.0018	4.1e-38	170.448
rs9077	1	202116238	A	G	0.33	-0.0138	0.0019	3.5e-13	52.7535
rs823074	1	205774839	T	C	0.5884	0.0112	0.0017	1.6e-10	43.4048
rs17014375	1	209543560	T	G	0.8652	-0.0172	0.0025	1.1e-11	47.3344
rs11118308	1	219633869	A	G	0.5297	0.0101	0.0016	4.8e-10	39.8477
rs10915840	1	225668524	A	G	0.283	-0.0118	0.0019	1.3e-09	38.5706
rs2491864	1	242986063	A	G	0.215	0.0137	0.0021	7.3e-11	42.5601
rs12042959	1	243533273	A	G	0.8495	0.0144	0.0024	3.4e-09	36
rs3753549	1	243722892	T	C	0.8563	-0.0203	0.0025	1.7e-15	65.9344
rs6548221	2	295255	A	G	0.2246	0.0151	0.002	1.7e-14	57.0025
rs4639527	2	416815	A	G	0.6988	-0.0172	0.0019	3.3e-20	81.9501
rs13021737	2	632348	A	G	0.1681	-0.0574	0.0021	7.5e-157	747.111
rs10929925	2	6155557	A	C	0.4301	-0.0143	0.0016	1.8e-18	79.8789
rs10182181	2	25150296	A	G	0.5247	-0.0325	0.0016	6.7e-90	412.598
rs4372836	2	28973883	T	C	0.3034	0.0142	0.0018	7.3e-16	62.2346
rs17327461	2	35512183	T	C	0.4498	0.0125	0.0016	1.5e-14	61.0352
rs4670626	2	37046657	T	C	0.3572	-0.0113	0.0018	4.9e-10	39.4105
rs6713781	2	40291940	C	G	0.4136	-0.0123	0.0018	3.8e-12	46.6944
rs17035438	2	46878616	A	G	0.09384	0.0199	0.003	3.3e-11	44.0011
rs7561278	2	48954905	T	C	0.786	0.0159	0.0021	5.7e-14	57.3265
rs930295	2	50233352	A	C	0.1583	0.0211	0.0023	1e-19	84.1607
rs7598402	2	50735943	C	G	0.51	0.0122	0.0017	2.1e-12	51.5017
rs7601895	2	55281901	C	G	0.7043	0.0149	0.0019	1.7e-15	61.4986
rs13432055	2	56603985	T	C	0.7141	-0.0117	0.0018	8.9e-11	42.25
rs929641	2	58792377	A	G	0.5837	0.015	0.0016	4.8e-20	87.8906
rs4671328	2	58935282	T	G	0.4467	0.0219	0.0017	2.2e-36	165.955
rs6545714	2	59307725	A	G	0.6139	-0.0191	0.0017	9.1e-31	126.232
rs4671358	2	60164634	A	T	0.5961	0.0101	0.0017	6.7e-09	35.2976
rs980329	2	60285100	T	C	0.7516	-0.0133	0.002	2.5e-11	44.2225
rs13417156	2	62848319	T	C	0.5639	-0.0144	0.0017	2.6e-17	71.7509
rs7607351	2	69562127	T	C	0.5807	0.0119	0.0017	8.4e-12	49
rs934515	2	79482643	A	G	0.1178	0.0185	0.0027	7.6e-12	46.9479
rs1371108	2	81816251	A	C	0.3247	0.0119	0.0018	9e-11	43.7068
rs7557796	2	86766153	T	C	0.3476	0.016	0.0018	2.3e-19	79.0123
rs4303732	2	100830040	T	C	0.6026	0.0144	0.0017	2.2e-16	71.7509
rs6711584	2	104421692	A	G	0.454	0.0128	0.0017	2.2e-13	56.692
rs1451533	2	105466005	A	G	0.273	0.0167	0.0019	1e-17	77.2548
rs902695	2	113955074	A	G	0.4798	-0.0103	0.0017	2.2e-09	36.7093
rs17551974	2	142293146	A	C	0.1782	-0.0141	0.0022	1.9e-10	41.0764
rs2890652	2	142959931	T	C	0.8241	-0.017	0.0023	2.5e-13	54.6314
rs6710871	2	143960593	A	G	0.1418	0.0179	0.0024	1e-13	55.6267
rs7560871	2	145616899	A	G	0.07332	0.0218	0.0034	9.6e-11	41.1107
rs453520	2	147907202	T	C	0.5834	-0.015	0.0017	7e-18	77.8547
rs7600699	2	156018263	C	G	0.8421	-0.0149	0.0024	6.4e-10	38.5434
rs6738445	2	172599615	T	C	0.2836	-0.0133	0.0018	1.9e-13	54.5957
rs10930641	2	175000711	A	G	0.5911	-0.0137	0.0017	3.6e-15	64.9446
rs9630985	2	181607676	A	C	0.3244	-0.0177	0.0018	4.4e-22	96.6944
rs10497807	2	198585087	C	G	0.5203	-0.011	0.0016	1.5e-11	47.2656
rs7564679	2	204012790	A	G	0.4284	-0.0116	0.0016	1.3e-12	52.5625
rs12694021	2	206084372	A	C	0.4481	0.0106	0.0017	1e-09	38.8789
rs972540	2	207244783	A	G	0.7272	-0.013	0.0018	8e-13	52.1605
rs17203016	2	208255518	A	G	0.804	-0.015	0.002	2.1e-13	56.25
rs4673553	2	211608379	T	G	0.5438	-0.0142	0.0017	2.1e-16	69.7716
rs1437929	2	211983316	A	G	0.2878	0.0135	0.0019	9.9e-13	50.4848
rs7599312	2	213413231	A	G	0.2652	-0.0186	0.0019	6.9e-24	95.8338
rs7607369	2	219279097	A	G	0.4387	0.0117	0.0016	9.3e-13	53.4727
rs11889536	2	220163543	A	G	0.8507	0.0189	0.0024	6.4e-15	62.0156
rs12479233	2	228891702	A	T	0.4874	-0.0121	0.0017	1.6e-12	50.6609
rs10211055	2	229016917	T	C	0.6544	-0.0157	0.0018	7.2e-18	76.0772
rs6720868	2	230663576	T	C	0.3286	0.0155	0.0018	5.1e-17	74.1512
rs1554193	3	8138801	A	T	0.4711	-0.0103	0.0017	4.4e-09	36.7093
rs3915844	3	9514856	A	G	0.1428	0.0152	0.0025	2.2e-09	36.9664
rs1899951	3	12394840	T	C	0.1314	0.017	0.0024	3.1e-12	50.1736
rs580438	3	13345450	T	C	0.3319	0.0114	0.0018	6.5e-10	40.1111
rs11128760	3	15873407	A	G	0.4026	0.011	0.0017	3.1e-10	41.8685
rs4858193	3	20441050	T	C	0.7221	0.0129	0.0019	1.6e-11	46.097
rs6804842	3	25106437	A	G	0.428	-0.0156	0.0017	3.6e-21	84.2076
rs9814633	3	41310470	A	G	0.3434	0.0122	0.0018	2.1e-11	45.9383
rs10460960	3	42308735	A	G	0.8876	0.0197	0.0025	8.1e-15	62.0944
rs28350	3	42418446	A	G	0.193	0.0177	0.0022	3.5e-15	64.7293
rs6442101	3	48130893	T	C	0.6817	-0.0117	0.0017	2.5e-11	47.3668
rs3731544	3	48207997	A	C	0.07127	0.0214	0.0031	7.5e-12	47.6545
rs2230590	3	49936102	T	C	0.4925	-0.0239	0.0017	4.1e-44	197.651
rs12631248	3	50080174	C	G	0.92236	-0.0253	0.003	3e-17	71.1211
rs9838283	3	50820486	A	G	0.7978	0.0161	0.0026	1e-09	38.3447
rs2710323	3	52815905	T	C	0.5196	-0.0141	0.0016	4.8e-18	77.6602
rs2680648	3	53777176	T	C	0.765	0.016	0.002	3.8e-15	64
rs12488237	3	56114861	T	C	0.94773	-0.0235	0.0036	4.5e-11	42.6119
rs2365389	3	61236462	T	C	0.4143	-0.0174	0.0017	1.3e-25	104.761
rs1452075	3	62481063	T	C	0.7277	0.0141	0.0018	1.3e-14	61.3611
rs925018	3	62713143	C	G	0.6765	-0.013	0.0018	1.4e-13	52.1605
rs11915371	3	70539559	A	C	0.7962	-0.0149	0.0021	2.6e-12	50.3424
rs775731	3	77624784	T	C	0.5878	-0.0108	0.0017	6.6e-10	40.3599
rs3849570	3	81792112	A	C	0.3414	0.0132	0.0017	3.3e-14	60.2907
rs10511093	3	83763541	T	C	0.07425	-0.0228	0.0034	1.1e-11	44.9689
rs1375561	3	85658230	T	C	0.6536	0.0173	0.0017	3.1e-24	103.561
rs2122042	3	85866335	T	G	0.2056	0.0235	0.002	2.3e-31	138.062
rs9714342	3	90428286	T	C	0.4231	-0.0151	0.0019	6.1e-15	63.1607
rs1454687	3	94038085	C	G	0.4773	0.0202	0.0017	5.2e-32	141.19
rs1436343	3	104606130	A	G	0.4078	-0.0141	0.0017	7.3e-16	68.7924
rs13321566	3	107342662	A	G	0.8159	-0.0135	0.0023	4.7e-09	34.4518
rs7640424	3	107820063	T	C	0.2969	-0.0136	0.0018	2.3e-14	57.0864
rs4273371	3	108119071	T	C	0.5016	-0.0115	0.0016	1.2e-12	51.6602
rs17681451	3	114399296	A	G	0.08384	-0.0197	0.0031	3.5e-10	40.384
rs6804181	3	116937546	A	T	0.8213	0.0153	0.0023	5.5e-11	44.2514
rs4624596	3	119571541	T	C	0.8149	0.0136	0.0023	2.2e-09	34.9641
rs2124499	3	123093541	C	G	0.3718	-0.0123	0.0017	3.4e-13	52.3495
rs1909586	3	124687767	T	G	0.5975	-0.0106	0.0018	4.8e-09	34.679
rs9809534	3	125189782	C	G	0.8769	0.0164	0.0026	2.3e-10	39.787
rs1320903	3	131758077	A	G	0.3174	0.0216	0.0018	9.2e-32	144
rs10935143	3	134665159	A	G	0.4535	-0.0109	0.0017	2.8e-10	41.1107
rs6786582	3	135898984	T	C	0.7255	-0.0159	0.0018	7.5e-18	78.0278
rs16851483	3	141275436	T	G	0.06928	0.0369	0.0035	3.2e-26	111.152
rs355777	3	154034950	C	G	0.4106	0.0153	0.0017	1.4e-18	81
rs7615297	3	156299313	C	G	0.8535	0.0149	0.0024	5.7e-10	38.5434
rs6767619	3	156893782	C	G	0.345	0.0119	0.0018	8.1e-11	43.7068
rs827092	3	157985182	T	C	0.5831	0.0129	0.0017	1.1e-13	57.5813
rs5396	3	170744815	T	C	0.7235	-0.0154	0.0018	3e-17	73.1975
rs39654	3	173095123	A	G	0.4453	-0.0145	0.0017	6.5e-17	72.7509
rs6443750	3	181329682	T	C	0.1932	-0.0148	0.0021	3.2e-12	49.6689
rs262956	3	183486117	T	G	0.3472	0.0125	0.0018	6.1e-12	48.2253
rs2293605	3	184044433	T	C	0.1307	-0.0167	0.0027	3.6e-10	38.2565
rs9816226	3	185834499	A	T	0.1801	-0.0323	0.0021	1.6e-52	236.574
rs6764533	3	196088464	A	G	0.359	0.0116	0.0018	1.4e-10	41.5309
rs1477887	4	18514827	A	G	0.4567	-0.0138	0.0017	2e-15	65.8962
rs1323068	4	20263058	A	G	0.3207	-0.0114	0.0018	6.9e-10	40.1111
rs9291467	4	25428296	T	C	0.4625	0.014	0.0017	6.7e-16	67.8201
rs6448587	4	28561990	A	C	0.8109	0.0167	0.0023	2.3e-13	52.7202
rs1345148	4	30843533	T	C	0.6034	-0.0111	0.0017	2.5e-10	42.6332
rs1000096	4	38692835	T	C	0.3801	-0.0144	0.0018	1.8e-15	64
rs1866510	4	44514468	T	C	0.3498	-0.0105	0.0018	8.1e-09	34.0278
rs10938397	4	45182527	A	G	0.5683	-0.0324	0.0016	3.4e-86	410.062
rs2768950	4	49064487	A	G	0.2507	0.0116	0.0019	7.5e-10	37.2742
rs711347	4	52926216	A	T	0.7489	-0.0122	0.0019	4.5e-10	41.2299
rs1492767	4	55221467	T	C	0.4957	0.0094	0.0016	1e-08	34.5156
rs2192158	4	55505360	A	G	0.4601	0.0129	0.0017	8.3e-14	57.5813
rs925421	4	60253877	A	G	0.2657	0.0116	0.002	5.8e-09	33.64
rs11945861	4	65700865	A	G	0.2369	-0.0148	0.002	5e-13	54.76
rs7674623	4	80794681	T	C	0.1976	0.0135	0.0022	5.7e-10	37.655
rs4148155	4	89054667	A	G	0.8873	0.0188	0.0026	5e-13	52.284
rs1903579	4	91253956	C	G	0.5502	0.0111	0.0017	1.1e-10	42.6332
rs2850969	4	102183594	T	C	0.8573	-0.0165	0.0024	1.3e-11	47.2656
rs7377083	4	102708997	A	C	0.4357	0.02	0.0018	1.4e-27	123.457
rs13107325	4	103188709	T	C	0.07373	0.047	0.0032	1.1e-47	215.723
rs6843738	4	103936001	A	G	0.329	-0.0107	0.0017	7.2e-10	39.6159
rs326889	4	112713436	T	C	0.3928	-0.0129	0.0018	2.4e-13	51.3611
rs7694732	4	115124089	A	G	0.5622	0.0099	0.0017	8.7e-09	33.9135
rs4864201	4	130731284	T	C	0.3531	0.0141	0.0017	1.5e-16	68.7924
rs1296328	4	137083193	A	C	0.4343	0.0179	0.0018	4.9e-24	98.892
rs769674	4	140881964	A	T	0.6781	0.0135	0.0018	2.2e-13	56.25
rs331949	4	143663206	T	C	0.6266	-0.011	0.0017	1e-10	41.8685
rs1455137	4	145986668	A	C	0.6197	-0.0106	0.0017	4.4e-10	38.8789
rs11736228	4	147376805	A	T	0.7413	0.0139	0.002	4.1e-12	48.3025
rs6827083	4	153075491	A	G	0.5691	-0.0097	0.0016	4.8e-09	36.7539
rs13110266	4	162129844	A	G	0.4065	-0.0117	0.0017	1.9e-12	47.3668
rs17538472	4	163038241	T	C	0.1908	0.0129	0.0022	4.2e-09	34.3822
rs1522569	4	171632637	T	G	0.8181	0.0164	0.0022	2.9e-13	55.5702
rs7683836	4	180167906	A	G	0.5405	-0.0114	0.0017	6.3e-11	44.9689
rs4518345	5	27185904	A	G	0.2842	-0.0117	0.0019	1e-09	37.9197
rs7730004	5	43191033	T	C	0.6693	0.0148	0.0018	9.1e-16	67.6049
rs12189178	5	50914726	T	C	0.03783	0.0364	0.0046	2.2e-15	62.6163
rs6449531	5	60712212	A	G	0.3537	-0.0127	0.0018	2.1e-12	49.7809
rs6888159	5	63932234	C	G	0.6828	0.0114	0.0018	5.8e-10	40.1111
rs2367112	5	64168193	T	G	0.5081	0.0119	0.0016	2.3e-13	55.3164
rs25832	5	66175682	A	G	0.732	0.0118	0.0019	9.2e-10	38.5706
rs2307111	5	75003678	T	C	0.6038	0.0265	0.0016	1.6e-58	274.316
rs368863	5	77372852	T	C	0.2393	-0.0117	0.002	8.1e-09	34.2225
rs12514473	5	80818639	T	C	0.7687	0.0167	0.002	8.8e-17	69.7225
rs7444298	5	87730027	A	G	0.7539	0.0179	0.002	7.8e-19	80.1025
rs2304607	5	87988733	A	G	0.852	-0.032	0.0025	1.7e-36	163.84
rs12655756	5	88858208	A	T	0.3697	0.0138	0.0018	1.9e-14	58.7778
rs159032	5	94206202	T	C	0.2439	0.0129	0.002	1.9e-10	41.6025
rs6235	5	95728898	C	G	0.7298	-0.0175	0.0019	1.5e-19	84.8338
rs2611742	5	95856501	T	C	0.5961	-0.0152	0.0017	3.7e-18	79.9446
rs3822683	5	96080883	A	G	0.7813	0.0145	0.0021	6.1e-12	47.6757
rs7710595	5	106506697	A	C	0.534	0.0101	0.0017	5e-09	35.2976
rs40067	5	107439012	A	G	0.1713	-0.0266	0.0023	7.1e-30	133.754
rs6595205	5	119372533	C	G	0.4695	0.0114	0.0016	2e-12	50.7656
rs7711753	5	122733317	A	G	0.4356	-0.0134	0.0016	3.4e-16	70.1406
rs6877851	5	130356413	C	G	0.2345	-0.0125	0.002	8.8e-10	39.0625
rs329124	5	133865452	A	G	0.5767	0.0131	0.0017	5.3e-14	59.3806
rs7716275	5	137631073	T	G	0.1933	-0.0132	0.0021	2.2e-10	39.5102
rs13174863	5	139080745	A	G	0.8452	-0.0192	0.0023	2.9e-16	69.6862
rs2190788	5	144484261	T	G	0.3106	0.0141	0.0019	2.9e-14	55.072
rs10066835	5	151254297	T	C	0.01637	0.0428	0.0074	6.5e-09	33.4522
rs7715256	5	153537893	T	G	0.5781	-0.0166	0.0016	2.2e-24	107.641
rs17056301	5	158271680	T	C	0.7364	-0.0118	0.002	2.4e-09	34.81
rs248139	5	167352783	A	G	0.1933	0.0133	0.0022	1.2e-09	36.5475
rs7730898	5	170459675	A	G	0.729	0.0168	0.0018	4.5e-20	87.1111
rs9463175	6	9510030	T	C	0.3483	-0.0108	0.0017	4.2e-10	40.3599
rs2228213	6	12124855	A	G	0.3481	-0.0139	0.0017	4.6e-16	66.8547
rs9367368	6	13189275	T	C	0.6967	0.0121	0.0018	1e-11	45.1883
rs11753081	6	20705590	T	G	0.8251	0.0138	0.0021	8.9e-11	43.1837
rs7760082	6	21919387	A	G	0.6646	-0.0122	0.0018	2.9e-11	45.9383
rs6900723	6	23876240	T	C	0.676	-0.0112	0.0018	1.4e-09	38.716
rs853679	6	28296863	A	C	0.1407	0.0134	0.0022	2.8e-09	37.0992
rs498240	6	31892592	A	G	0.0656	-0.0267	0.0033	1.6e-15	65.4628
rs419261	6	33554147	T	C	0.4042	0.0106	0.0017	1.9e-10	38.8789
rs2814992	6	34617144	A	G	0.6599	-0.0245	0.0017	4.1e-45	207.699
rs12215331	6	34644749	T	C	0.7864	0.0177	0.002	4.3e-18	78.3225
rs6938239	6	34683635	A	G	0.8504	-0.0271	0.0025	2.4e-28	117.506
rs9394312	6	35672330	C	G	0.4917	0.0109	0.0017	2.3e-10	41.1107
rs17757975	6	38214150	T	C	0.8518	0.0143	0.0024	4.2e-09	35.5017
rs847747	6	40080069	T	G	0.2964	-0.0113	0.0019	2.1e-09	35.3712
rs2033529	6	40348653	A	G	0.7064	-0.0205	0.0018	1.9e-30	129.707
rs7748777	6	41133806	A	G	0.4587	0.0105	0.0016	1.6e-10	43.0664
rs9349239	6	42676480	A	G	0.492	0.0122	0.0017	1.3e-12	51.5017
rs998584	6	43757896	A	C	0.4775	-0.0131	0.0017	1.3e-14	59.3806
rs10456637	6	50763935	A	T	0.7406	0.0134	0.0019	4.3e-12	49.7396
rs987237	6	50803050	A	G	0.8197	-0.0409	0.0021	9.3e-84	379.322
rs2635727	6	50820940	T	C	0.2541	-0.028	0.0019	1.3e-49	217.175
rs1178060	6	50914343	A	G	0.8469	0.0193	0.0023	6.8e-17	70.414
rs2504674	6	51160682	C	G	0.4336	-0.0112	0.0017	1.2e-10	43.4048
rs1358808	6	51825285	C	G	0.6735	-0.0142	0.0018	9.2e-15	62.2346
rs4278019	6	53693410	A	T	0.2815	0.0112	0.0019	5e-09	34.7479
rs9475173	6	55013291	A	G	0.6535	0.0108	0.0019	6.6e-09	32.3102
rs1020548	6	56810539	A	G	0.8344	-0.0132	0.0023	6.6e-09	32.9376
rs6921533	6	73742334	T	C	0.2882	0.0118	0.0019	5.6e-10	38.5706
rs9688431	6	73922654	T	C	0.93966	0.0231	0.0035	2.4e-11	43.56
rs9294260	6	83433228	A	G	0.4731	0.0147	0.0016	1.8e-19	84.4102
rs1853639	6	87606842	A	G	0.6363	-0.0111	0.0018	1.2e-09	38.0278
rs9362662	6	90296588	A	G	0.4799	0.0112	0.0017	1.2e-10	43.4048
rs1324110	6	93913200	C	G	0.4391	-0.0103	0.0017	6.8e-10	36.7093
rs13209872	6	97753223	C	G	0.3403	-0.0152	0.0018	1.4e-16	71.3086
rs901630	6	98539519	T	C	0.3973	-0.0146	0.0017	1.9e-18	73.7578
rs156151	6	104799007	C	G	0.1912	-0.0165	0.0021	1.9e-14	61.7347
rs3800229	6	108996963	T	G	0.7123	0.0175	0.0018	1.4e-22	94.5216
rs2357760	6	120213880	A	G	0.6754	0.0145	0.0017	6.8e-17	72.7509
rs2875762	6	124925032	C	G	0.2473	0.0139	0.002	1.2e-11	48.3025
rs13209968	6	126089285	C	G	0.5177	0.0114	0.0017	3.1e-11	44.9689
rs6569648	6	130349119	T	C	0.7726	-0.0126	0.0019	3.7e-11	43.9778
rs2781668	6	131897278	T	C	0.1612	0.0169	0.0023	4e-13	53.9905
rs13201877	6	137675541	A	G	0.8601	-0.0152	0.0024	2.7e-10	40.1111
rs2185027	6	153381622	A	C	0.7032	-0.0135	0.0018	5e-14	56.25
rs10499276	6	154309808	T	C	0.1242	0.0172	0.0025	2.2e-12	47.3344
rs487060	6	160774459	T	C	0.4816	0.011	0.0016	1.6e-11	47.2656
rs13191362	6	163033350	A	G	0.8802	0.0236	0.0025	5.9e-21	89.1136
rs6461115	7	2103668	A	G	0.7715	0.0144	0.0019	1.2e-13	57.4404
rs4722398	7	3125220	T	C	0.1336	0.0158	0.0025	3.6e-10	39.9424
rs6463489	7	5542513	T	C	0.1087	0.0157	0.0026	3.1e-09	36.463
rs7784465	7	6418275	T	C	0.8607	-0.0164	0.0025	1.1e-10	43.0336
rs6968554	7	17287106	A	G	0.3602	-0.01	0.0017	3.5e-09	34.6021
rs40245	7	21470536	A	T	0.3591	0.011	0.0018	1.9e-09	37.3457
rs4307239	7	24354300	A	G	0.5422	-0.0115	0.0017	3.9e-11	45.7612
rs11971041	7	26698848	A	G	0.90616	-0.021	0.0031	1e-11	45.8897
rs4722672	7	27231762	T	C	0.8151	-0.0151	0.0021	1.8e-12	51.7029
rs849135	7	28196413	A	G	0.4914	0.0109	0.0016	2e-11	46.4102
rs215632	7	32368524	A	G	0.3618	0.0152	0.0018	3.7e-17	71.3086
rs1229057	7	39054538	T	C	0.1216	0.017	0.0027	2.8e-10	39.6433
rs799449	7	44784697	T	C	0.5505	0.013	0.0017	8.7e-14	58.4775
rs10269783	7	49616203	A	G	0.3896	0.0133	0.0017	1.4e-15	61.2076
rs3807566	7	50564204	T	G	0.443	-0.0127	0.0017	2e-13	55.8097
rs1035010	7	69598328	T	C	0.2566	0.0139	0.002	6.2e-12	48.3025
rs4718966	7	70040558	T	C	0.4183	0.0127	0.0018	4.6e-13	49.7809
rs13227433	7	74094721	T	G	0.7438	-0.0156	0.002	1.4e-14	60.84
rs17207196	7	75101065	T	C	0.4118	-0.0221	0.0018	2.1e-35	150.744
rs740157	7	77055885	A	G	0.4322	0.0116	0.0016	1.8e-12	52.5625
rs1544459	7	77417584	T	C	0.5464	-0.0103	0.0016	2.2e-10	41.4414
rs1852006	7	77829768	A	G	0.3519	-0.0156	0.0018	4.9e-18	75.1111
rs7805441	7	78121458	T	C	0.5092	0.0109	0.0017	3.4e-10	41.1107
rs6963840	7	78144371	T	C	0.2111	0.0154	0.0024	3.4e-10	41.1736
rs13247665	7	93232057	T	C	0.6407	-0.0139	0.0018	1.4e-14	59.6327
rs13240600	7	99064466	A	G	0.8448	0.0204	0.0024	3.5e-17	72.25
rs11496125	7	103417557	T	C	0.4212	0.0169	0.0017	3e-22	98.827
rs10953620	7	109173373	A	C	0.5173	-0.0101	0.0017	5.4e-09	35.2976
rs13227658	7	113353254	T	C	0.5534	-0.0157	0.0017	1.7e-19	85.2907
rs12705987	7	114349212	A	T	0.4036	0.0135	0.0017	9.5e-15	63.0623
rs1899689	7	121964349	T	C	0.3986	0.0117	0.0016	1.5e-12	53.4727
rs2283093	7	126721231	T	C	0.2066	0.0127	0.0021	3.1e-09	36.5737
rs972283	7	130466854	A	G	0.4849	0.0096	0.0016	5.1e-09	36
rs3800649	7	137424509	A	G	0.277	0.0122	0.0019	3.2e-10	41.2299
rs1814170	7	138794149	A	T	0.8946	0.0203	0.0029	2.1e-12	49
rs11773362	7	147668180	T	C	0.3369	-0.0111	0.0018	1.5e-09	38.0278
rs4725984	7	150668514	T	C	0.359	-0.0128	0.0017	1.4e-13	56.692
rs1658820	8	4288577	T	G	0.2468	0.0141	0.0021	5.9e-12	45.0816
rs7827182	8	8380471	C	G	0.4946	0.0177	0.0018	1.7e-22	96.6944
rs1394	8	9511654	A	G	0.6404	-0.0154	0.0017	2.8e-19	82.0623
rs11250076	8	10647823	A	G	0.4385	0.0184	0.0018	3.2e-23	104.494
rs11783247	8	10788875	T	C	0.5375	-0.0169	0.0016	1.2e-24	111.566
rs4841659	8	11828200	T	C	0.4785	0.0149	0.0017	9.2e-18	76.8201
rs13263601	8	14095900	A	C	0.6522	-0.0154	0.0018	2.2e-17	73.1975
rs10110727	8	14324437	A	G	0.2926	0.0135	0.002	3.2e-11	45.5625
rs2543132	8	15536311	C	G	0.8134	0.0146	0.0022	5e-11	44.0413
rs4366093	8	20639811	T	C	0.3202	-0.0121	0.0018	6.7e-11	45.1883
rs11781222	8	23389571	T	C	0.8714	0.0158	0.0024	5.3e-11	43.3403
rs17446091	8	27167942	T	C	0.7926	-0.0123	0.002	1.8e-09	37.8225
rs1982441	8	28021769	T	G	0.1381	0.0175	0.0026	7e-12	45.3033
rs2100814	8	28118130	A	G	0.4103	0.0113	0.0017	1.2e-10	44.1834
rs1362910	8	30856464	A	G	0.4185	0.0121	0.0017	1.2e-12	50.6609
rs7844647	8	34503776	T	C	0.7319	0.0123	0.0018	2.8e-11	46.6944
rs4737183	8	64720693	A	G	0.5295	0.0112	0.0017	1.1e-10	43.4048
rs16932761	8	67202787	A	G	0.2542	-0.014	0.002	1.7e-12	49
rs1431659	8	73439070	A	G	0.2656	0.0196	0.0019	6e-24	106.416
rs2170382	8	74689288	T	C	0.1203	0.0172	0.0027	2.4e-10	40.5816
rs1405348	8	77228222	A	G	0.4324	-0.0204	0.0017	6.2e-32	144
rs16907751	8	81375457	T	C	0.1047	-0.0209	0.003	1.6e-12	48.5344
rs733594	8	85077686	T	C	0.718	0.0138	0.0018	5.9e-14	58.7778
rs2634047	8	85696337	C	G	0.2422	-0.0149	0.002	2.5e-13	55.5025
rs7006629	8	87519542	T	C	0.5258	0.0109	0.0017	2.5e-10	41.1107
rs1700137	8	89461609	T	C	0.3121	-0.0121	0.0019	2.5e-10	40.5568
rs12680842	8	95582606	A	G	0.6795	0.0133	0.0018	4.4e-14	54.5957
rs3134353	8	101947453	A	T	0.3868	-0.0125	0.0018	2.5e-12	48.2253
rs3808434	8	116559435	A	G	0.4475	0.011	0.0016	1.3e-11	47.2656
rs2721965	8	116662038	A	C	0.6665	0.0171	0.0018	1.1e-20	90.25
rs11781699	8	118863061	T	C	0.8104	-0.0132	0.0021	3.1e-10	39.5102
rs12675063	8	132879047	A	T	0.8869	-0.0156	0.0026	1.3e-09	36
rs16906845	8	138215228	A	G	0.06683	-0.0225	0.0038	2.2e-09	35.0589
rs903959	8	142630782	A	T	0.3965	0.0106	0.0018	1.6e-09	34.679
rs7042372	9	6959840	A	G	0.6573	0.0122	0.0018	3.8e-11	45.9383
rs1865341	9	8845911	T	C	0.758	0.0128	0.002	2.5e-10	40.96
rs17820822	9	11831420	T	G	0.6446	0.0143	0.0018	2.9e-15	63.1142
rs11790280	9	14651283	T	C	0.6138	-0.0103	0.0018	7.1e-09	32.7438
rs6474945	9	15670492	T	G	0.4498	-0.0186	0.0016	4.7e-30	135.141
rs10962549	9	16719445	T	C	0.168	0.0198	0.0023	2.5e-17	74.1096
rs7874154	9	27777012	T	C	0.5021	-0.0127	0.0017	1.8e-13	55.8097
rs1412235	9	28410996	C	G	0.3175	0.0246	0.0017	6e-45	209.398
rs10971712	9	33820938	T	C	0.1076	-0.0197	0.0027	6.4e-13	53.2359
rs13290794	9	37183628	A	G	0.3582	-0.0141	0.0018	1.9e-15	61.3611
rs2174307	9	73791849	C	G	0.4067	0.0121	0.0017	4.9e-12	50.6609
rs10867256	9	81367391	T	C	0.553	-0.0118	0.0017	8.7e-12	48.1799
rs3739733	9	88897891	A	G	0.7803	0.0132	0.0021	5.3e-10	39.5102
rs10797115	9	92191256	T	C	0.5365	0.0124	0.0017	9.9e-13	53.2042
rs7869771	9	94180627	A	C	0.7353	0.014	0.0019	4.9e-13	54.2936
rs4744275	9	96482633	A	G	0.266	0.0144	0.0018	7e-15	64
rs450231	9	101481205	A	G	0.7534	-0.0127	0.002	2.1e-10	40.3225
rs10118701	9	103061366	A	G	0.6773	-0.0163	0.0018	1.1e-18	82.0031
rs10989568	9	104396304	A	G	0.4619	0.0107	0.0017	6.6e-10	39.6159
rs7024334	9	109072075	T	G	0.2258	0.0138	0.002	3.1e-12	47.61
rs6477694	9	111932342	T	C	0.6441	-0.0123	0.0017	3.8e-13	52.3495
rs1928295	9	120378483	T	C	0.5539	0.0141	0.0016	5.4e-18	77.6602
rs7865157	9	122631560	T	C	0.1068	0.0177	0.0028	3.7e-10	39.9605
rs10818810	9	126096522	A	G	0.3908	0.0126	0.0017	1.1e-13	54.9343
rs10818938	9	127049237	A	G	0.4215	0.0114	0.0017	5.1e-11	44.9689
rs3829849	9	129390800	T	C	0.3589	0.0098	0.0017	5.9e-09	33.2318
rs3902840	9	129419025	A	G	0.08589	0.0222	0.003	3.2e-13	54.76
rs13292976	9	129467340	T	C	0.4458	0.0131	0.0017	3.1e-14	59.3806
rs7871866	9	131027982	C	G	0.1531	0.0187	0.0024	2.3e-14	60.7101
rs4740383	9	133783566	A	G	0.416	0.0126	0.0018	1.9e-12	49
rs11792069	9	140646121	A	G	0.83	0.0145	0.0024	6.5e-10	36.5017
rs11251352	10	2585792	A	G	0.4012	-0.0109	0.0018	7e-10	36.6698
rs7893571	10	16750129	T	G	0.662	0.0136	0.0018	1.8e-13	57.0864
rs12776880	10	19776828	A	T	0.6828	0.0128	0.0019	3e-11	45.385
rs7084454	10	21821274	A	G	0.335	0.0193	0.0019	4e-25	103.183
rs3781099	10	27318776	T	C	0.08203	0.021	0.0031	2.5e-11	45.8897
rs3851083	10	33862727	A	G	0.4325	-0.0102	0.0016	4.1e-10	40.6406
rs1937684	10	53680085	A	T	0.6592	0.0112	0.0018	8.7e-10	38.716
rs2163188	10	65314711	C	G	0.474	0.0131	0.0017	2e-14	59.3806
rs12098284	10	76047464	T	C	0.1241	0.0178	0.0026	1.8e-11	46.8698
rs7899106	10	87410904	A	G	0.95223	-0.0331	0.0037	1e-18	80.0299
rs10887578	10	88096047	C	G	0.4896	0.0128	0.0017	1.6e-13	56.692
rs2631681	10	93032943	T	C	0.3252	-0.0113	0.0017	8.9e-11	44.1834
rs577525	10	99769388	T	C	0.4324	-0.0166	0.0017	9.7e-22	95.3495
rs1983864	10	100017453	T	G	0.6674	0.0158	0.0018	3.7e-18	77.0494
rs17094222	10	102395440	T	C	0.7961	-0.0181	0.002	2.2e-19	81.9025
rs10883553	10	102635475	A	C	0.4511	0.0119	0.0018	1.9e-11	43.7068
rs9787495	10	103206115	A	G	0.4366	-0.0103	0.0017	3.1e-09	36.7093
rs7083450	10	103984060	T	C	0.8388	0.0159	0.0023	1.7e-12	47.7902
rs10883759	10	104412049	A	G	0.3023	-0.0122	0.0018	5.4e-12	45.9383
rs12411886	10	104685299	A	C	0.08261	0.0271	0.003	1.5e-19	81.6011
rs7903146	10	114758349	T	C	0.2912	-0.0181	0.0018	1.3e-23	101.114
rs10886017	10	118672531	A	C	0.2524	0.0152	0.0019	1.4e-15	64
rs845084	10	125220036	A	G	0.2678	0.014	0.002	1.3e-12	49
rs17636031	10	126594078	T	C	0.7299	-0.016	0.0019	1.2e-17	70.9141
rs10840606	11	2234690	A	G	0.8259	-0.0164	0.0024	3.2e-12	46.6944
rs12575252	11	8694073	C	G	0.351	-0.0182	0.0017	1.8e-26	114.616
rs1037587	11	11796727	T	C	0.4535	0.0106	0.0017	1.1e-09	38.8789
rs900144	11	13294268	T	C	0.5674	0.0166	0.0017	8.7e-22	95.3495
rs10832778	11	17394073	C	G	0.3778	-0.0125	0.0017	1.3e-13	54.0657
rs7124442	11	27677041	T	C	0.6832	-0.0286	0.0017	4.6e-61	283.031
rs6265	11	27679916	T	C	0.1951	-0.0412	0.0021	1e-86	384.907
rs7948120	11	28763321	T	C	0.2598	-0.0132	0.0019	7.3e-12	48.2659
rs1552717	11	29158495	A	T	0.8652	0.0149	0.0025	3.5e-09	35.5216
rs1782507	11	30243868	T	G	0.6532	-0.0135	0.0018	1.3e-13	56.25
rs223051	11	32131303	T	C	0.6759	0.0112	0.0018	1.1e-09	38.716
rs10838122	11	43551416	T	C	0.4802	-0.0105	0.0017	1.5e-09	38.1488
rs12577642	11	43728534	A	T	0.686	-0.0213	0.0018	9.9e-31	140.028
rs12574668	11	46422686	A	C	0.1785	0.0132	0.0023	8.8e-09	32.9376
rs7124681	11	47529947	A	C	0.4133	0.0263	0.0016	3.2e-58	270.191
rs7131262	11	47836302	A	T	0.2605	-0.0216	0.0018	1e-32	144
rs7120873	11	49459474	T	C	0.111	0.0172	0.0027	3.4e-10	40.5816
rs11600990	11	64082807	T	C	0.1569	-0.0178	0.0023	3.8e-14	59.8941
rs7102454	11	65594820	T	C	0.6565	-0.0158	0.0018	2.4e-18	77.0494
rs587230	11	69299771	A	G	0.165	0.0149	0.0023	4.7e-11	41.9679
rs1789165	11	69481969	A	G	0.6389	0.0138	0.0017	8e-16	65.8962
rs7123876	11	72444583	T	C	0.754	-0.0119	0.0019	2.2e-10	39.2271
rs7117238	11	78040259	A	G	0.168	-0.0131	0.0022	2.5e-09	35.4566
rs10830452	11	89966202	A	G	0.6712	-0.0111	0.0018	2.1e-09	38.0278
rs2605603	11	93221105	A	G	0.4887	-0.0103	0.0016	2.5e-10	41.4414
rs719802	11	113234679	T	C	0.3803	0.0101	0.0018	9.5e-09	31.4846
rs1048932	11	115044850	A	C	0.4162	-0.016	0.0017	3.8e-22	88.5813
rs12420725	11	117017530	A	G	0.94142	-0.0226	0.0037	1.3e-09	37.309
rs9332817	11	118365210	C	G	0.02561	-0.0382	0.006	1.7e-10	40.5344
rs1003081	11	118913993	T	C	0.4497	0.0121	0.0016	1.3e-13	57.1914
rs4936671	11	121942512	C	G	0.3672	0.0105	0.0018	6.2e-09	34.0278
rs7941030	11	122522375	T	C	0.6141	-0.0112	0.0017	2e-11	43.4048
rs3134438	11	122765667	A	C	0.2855	0.0113	0.0019	6.1e-09	35.3712
rs1625427	11	131957293	T	C	0.6504	0.013	0.0018	1.4e-12	52.1605
rs4936175	11	132641959	T	C	0.5555	-0.0122	0.0017	1.4e-12	51.5017
rs329651	11	133767622	T	G	0.8055	0.0164	0.0021	9e-15	60.9887
rs12364470	11	134601012	T	G	0.8374	-0.0178	0.0022	1.1e-15	65.4628
rs11611246	12	939480	T	G	0.21	0.024	0.002	5e-32	144
rs2429150	12	2152655	A	C	0.5836	-0.0111	0.0018	2.7e-10	38.0278
rs12422552	12	14413931	C	G	0.2663	-0.0134	0.002	1.6e-11	44.89
rs10744146	12	17212881	A	G	0.5146	-0.0122	0.0017	1.4e-12	51.5017
rs621042	12	18789007	A	C	0.451	-0.0107	0.0017	6.3e-10	39.6159
rs10842240	12	24060075	C	G	0.1158	0.0218	0.0027	3.1e-16	65.1907
rs10772055	12	33379440	C	G	0.8656	-0.0172	0.0024	2.1e-12	51.3611
rs10876418	12	39428802	T	C	0.2325	-0.0123	0.0019	2.8e-10	41.9086
rs2733287	12	41880909	A	C	0.5171	-0.0157	0.0017	6.8e-20	85.2907
rs7138803	12	50247468	A	G	0.3772	0.03	0.0017	2.3e-71	311.419
rs4077093	12	51593616	T	G	0.217	0.0128	0.0022	5.1e-09	33.8512
rs4759073	12	54653258	A	G	0.4005	-0.0116	0.0017	2.8e-11	46.5606
rs4759228	12	56508409	C	G	0.2971	-0.0157	0.0019	5.9e-16	68.2798
rs7975187	12	60964108	A	G	0.7926	-0.0128	0.0021	1.4e-09	37.1519
rs1819844	12	68205604	A	G	0.1797	0.0143	0.0021	2.6e-11	46.3696
rs10878946	12	69642315	T	C	0.714	-0.0141	0.0019	3.6e-13	55.072
rs11115176	12	82465797	T	C	0.7601	0.0121	0.0019	2e-10	40.5568
rs2731222	12	90595383	A	C	0.2703	0.0131	0.0019	1.5e-11	47.5374
rs10745785	12	97586257	T	C	0.6674	-0.0111	0.0018	1.2e-09	38.0278
rs651548	12	99560183	A	G	0.3677	0.0139	0.0018	2e-14	59.6327
rs4764949	12	103658096	A	G	0.6643	0.0184	0.0018	1.7e-23	104.494
rs11611496	12	108413828	A	G	0.2218	-0.0169	0.002	1.7e-16	71.4025
rs17608150	12	110046698	T	C	0.07536	0.0196	0.0031	1.3e-10	39.975
rs6606686	12	110903380	C	G	0.6903	-0.0136	0.0018	7.6e-15	57.0864
rs11066301	12	112871372	A	G	0.5661	0.0114	0.0016	4.4e-12	50.7656
rs4766710	12	114437708	A	G	0.9358	0.0229	0.0035	3.7e-11	42.809
rs7973955	12	118409640	A	G	0.2847	-0.0126	0.0019	3.7e-11	43.9778
rs3887080	12	121661966	A	G	0.1214	0.0181	0.0026	5.1e-12	48.463
rs7133378	12	124409502	A	G	0.3269	0.0125	0.0018	9.4e-13	48.2253
rs10773049	12	124506631	T	C	0.5983	-0.0116	0.0017	4.1e-12	46.5606
rs7968230	12	133481917	A	G	0.3226	0.0131	0.0018	1.6e-12	52.966
rs1218822	13	28011963	A	G	0.6663	0.0168	0.0017	1.9e-22	97.6609
rs1006353	13	28047269	A	G	0.2485	0.0126	0.0019	2.3e-11	43.9778
rs9507983	13	28620036	T	C	0.6072	-0.0156	0.0018	1.4e-18	75.1111
rs1045411	13	31033232	T	C	0.2647	-0.0148	0.0019	2.3e-15	60.6759
rs9595908	13	33184288	T	C	0.6277	0.0159	0.0017	4.2e-21	87.4775
rs9603697	13	40783323	T	C	0.3186	0.0141	0.0018	2.6e-14	61.3611
rs12429545	13	54102206	A	G	0.1248	0.0316	0.0025	9.6e-38	159.77
rs9527706	13	58402479	A	G	0.7286	-0.0115	0.0018	5.1e-10	40.8179
rs9538141	13	59178258	A	G	0.509	0.0164	0.0017	3.5e-21	93.0657
rs1333423	13	59425111	A	T	0.2253	0.0168	0.002	2.1e-16	70.56
rs892261	13	65884191	T	C	0.4429	-0.0103	0.0017	2.2e-09	36.7093
rs9540493	13	66205704	A	G	0.4419	0.0139	0.0017	8.1e-17	66.8547
rs9571687	13	67472713	A	C	0.329	-0.0129	0.0018	2.8e-12	51.3611
rs629443	13	76386075	T	G	0.2501	0.0116	0.0019	1.4e-09	37.2742
rs1668633	13	78371890	T	C	0.5738	0.01	0.0017	8.7e-09	34.6021
rs9530843	13	79563749	A	C	0.5558	0.0128	0.0018	4.8e-13	50.5679
rs1927790	13	96922191	T	C	0.5891	-0.0148	0.0016	1.8e-19	85.5625
rs7334078	13	99120484	T	C	0.7118	0.0121	0.0019	2.2e-10	40.5568
rs2479958	13	111984244	A	G	0.4925	0.0154	0.0018	1.5e-17	73.1975
rs10132280	14	25928179	A	C	0.3017	-0.0223	0.0018	5.6e-35	153.485
rs4981693	14	29680331	A	G	0.771	0.0206	0.002	6.9e-24	106.09
rs12885454	14	29736838	A	C	0.3431	-0.0185	0.0017	2.4e-27	118.426
rs8016859	14	30484722	C	G	0.03964	0.0349	0.0043	7.1e-16	65.874
rs17522122	14	33302882	T	G	0.4812	0.0159	0.0017	1.5e-21	87.4775
rs9806058	14	35673470	A	T	0.877	0.0164	0.0026	4e-10	39.787
rs1956151	14	40101060	A	G	0.8213	-0.013	0.0022	7.3e-09	34.9174
rs12587412	14	47272423	T	G	0.4896	0.0146	0.0017	4.8e-17	73.7578
rs217671	14	62360464	A	G	0.7281	-0.0144	0.0019	1.3e-13	57.4404
rs3902951	14	69789755	T	G	0.7545	-0.0134	0.002	7e-12	44.89
rs17105272	14	77529783	T	C	0.3186	0.011	0.0019	3.2e-09	33.518
rs10146527	14	79499850	T	C	0.6361	0.0137	0.0017	2.3e-15	64.9446
rs7144011	14	79940383	T	G	0.2136	0.0282	0.002	5.2e-47	198.81
rs12888545	14	88308044	A	G	0.7481	-0.0136	0.002	9.1e-12	46.24
rs1951455	14	91512339	T	C	0.2747	-0.0145	0.0019	4.5e-14	58.241
rs3850422	14	99671788	A	G	0.446	-0.0114	0.0016	3.7e-12	50.7656
rs12147845	14	101144596	T	C	0.1135	0.0199	0.0027	4.5e-13	54.3224
rs7147503	14	101539384	T	C	0.3697	-0.0119	0.0018	2e-11	43.7068
rs8016771	14	102649451	T	G	0.91248	-0.019	0.0031	1.1e-09	37.565
rs3803286	14	103246470	A	G	0.3431	0.0181	0.0018	4.1e-23	101.114
rs2010281	14	103862322	A	G	0.3552	-0.0161	0.0017	6.7e-21	89.692
rs4906908	15	27040082	T	G	0.4747	-0.0103	0.0017	2.5e-09	36.7093
rs4284600	15	31843528	T	C	0.5288	-0.0118	0.0017	1.3e-11	48.1799
rs7181610	15	35826859	A	T	0.8585	0.0145	0.0025	7.8e-09	33.64
rs8036040	15	36402716	A	C	0.4932	0.0109	0.0017	2.7e-10	41.1107
rs12439798	15	46584787	T	G	0.4228	0.0125	0.0017	6.9e-13	54.0657
rs3736485	15	51748610	A	G	0.4557	0.0134	0.0016	2.5e-16	70.1406
rs340025	15	60908307	T	C	0.4276	-0.0124	0.0017	1e-13	53.2042
rs8033510	15	61445514	T	C	0.3713	0.0106	0.0018	5.1e-09	34.679
rs17238110	15	62150364	A	G	0.8366	0.0353	0.005	2e-12	49.8436
rs12595158	15	62316035	T	C	0.02362	-0.0394	0.0054	1.9e-13	53.2359
rs11635675	15	63793238	T	G	0.6465	0.0124	0.0018	1.3e-11	47.4568
rs11629783	15	66741387	C	G	0.7692	0.0146	0.002	9.8e-13	53.29
rs13329567	15	68104367	T	C	0.2308	-0.0293	0.002	1e-50	214.623
rs7164727	15	73093991	T	C	0.681	0.0182	0.0017	3.3e-25	114.616
rs11855853	15	78012618	T	C	0.2649	-0.0145	0.002	2.4e-13	52.5625
rs12595749	15	79432359	A	G	0.5714	0.0141	0.0017	5.7e-16	68.7924
rs12593036	15	81058652	A	G	0.7007	0.0154	0.0019	3.8e-16	65.6953
rs12101393	15	92570921	C	G	0.7803	0.0127	0.0021	1.5e-09	36.5737
rs7181498	15	95271404	T	C	0.3691	0.0163	0.0018	1e-19	82.0031
rs11866815	16	387867	T	C	0.2461	-0.0156	0.0019	1e-16	67.4127
rs2516739	16	2097158	A	G	0.2171	-0.0159	0.0021	1.4e-14	57.3265
rs12448257	16	3599655	A	G	0.218	0.0184	0.002	8.1e-20	84.64
rs879620	16	4015729	T	C	0.6179	0.0231	0.0018	5.3e-38	164.694
rs10083803	16	6701400	T	C	0.2605	-0.0127	0.0019	5.9e-11	44.6787
rs977540	16	9724750	A	G	0.7617	0.014	0.0019	2.5e-13	54.2936
rs4985155	16	15129459	A	G	0.6631	0.012	0.0017	3e-12	49.827
rs12446632	16	19935389	A	G	0.1424	-0.0352	0.0024	2.9e-50	215.111
rs868554	16	20050466	C	G	0.7537	-0.019	0.002	1.2e-20	90.25
rs11074446	16	20255123	T	C	0.8694	0.0225	0.0024	1.8e-20	87.8906
rs9931967	16	20375351	T	G	0.5082	0.0163	0.0017	1e-20	91.9343
rs9927848	16	23833071	A	C	0.7326	-0.0122	0.002	6.4e-10	37.21
rs7195386	16	24578458	T	C	0.5014	0.0133	0.0017	1.1e-14	61.2076
rs1862451	16	24803620	A	G	0.7312	0.0137	0.0019	1.9e-12	51.9917
rs7187776	16	28857645	A	G	0.5927	-0.0265	0.0016	1.4e-58	274.316
rs1057452	16	29833714	A	G	0.03713	0.0173	0.0024	1.6e-12	51.9601
rs3814883	16	29994922	T	C	0.4764	0.0232	0.0017	1.1e-40	186.242
rs1549293	16	31141993	T	C	0.3596	-0.0204	0.0017	7.6e-33	144
rs2080454	16	49062590	A	C	0.6211	-0.0129	0.0017	1.7e-14	57.5813
rs8047395	16	53798523	A	G	0.5061	0.0642	0.0017	0	1426.17
rs11075986	16	53805344	C	G	0.9147	0.032	0.003	5.6e-26	113.778
rs3751813	16	53818708	T	G	0.541	0.0603	0.0016	2.2e-295	1420.35
rs9922708	16	53831146	T	C	0.4323	0.0692	0.0016	0	1870.56
rs2075205	16	54153099	A	T	0.5866	0.0111	0.0017	1.8e-10	42.6332
rs12448738	16	56489343	A	C	0.8629	-0.0168	0.0025	2.8e-11	45.1584
rs11075489	16	62803841	T	C	0.4828	-0.0111	0.0017	1.3e-10	42.6332
rs7200919	16	67316600	A	G	0.4134	0.0095	0.0017	9.3e-09	31.2284
rs2307022	16	68381978	A	G	0.3344	0.0135	0.0017	5.5e-15	63.0623
rs889398	16	69556715	T	C	0.4247	-0.0196	0.0016	1.3e-32	150.062
rs7919	16	70514828	A	C	0.4495	-0.0158	0.0017	1e-19	86.3806
rs11642001	16	71899586	A	G	0.2121	-0.0137	0.0021	5.1e-11	42.5601
rs756717	16	72996162	A	G	0.3973	-0.0148	0.0017	5.4e-18	75.7924
rs825680	16	73606563	A	T	0.5827	0.0104	0.0018	6.7e-09	33.3827
rs6564360	16	76779612	A	G	0.8095	-0.0135	0.0022	1.2e-09	37.655
rs12922346	16	82438337	C	G	0.2657	0.0136	0.002	1e-11	46.24
rs4783241	16	82650384	C	G	0.4938	-0.0108	0.0017	4e-10	40.3599
rs7206608	16	82872628	C	G	0.6854	-0.0132	0.0019	1.3e-12	48.2659
rs4516268	17	1846831	A	C	0.1925	-0.0217	0.0021	5.2e-25	106.778
rs7217226	17	2136065	T	G	0.6404	-0.013	0.0017	2.6e-14	58.4775
rs1000940	17	5283252	A	G	0.7013	-0.0154	0.0018	1.1e-17	73.1975
rs17681708	17	9792872	T	C	0.6877	-0.0106	0.0018	7.2e-09	34.679
rs1075901	17	15943910	T	C	0.4361	-0.0121	0.0016	1.2e-13	57.1914
rs4986044	17	21261560	T	C	0.4687	-0.0164	0.0016	3.3e-23	105.062
rs1038088	17	28074563	T	G	0.4919	-0.0117	0.0016	4.6e-13	53.4727
rs7211567	17	31460899	T	C	0.2201	-0.0145	0.0021	4.5e-12	47.6757
rs1106908	17	34942595	A	G	0.4409	-0.0158	0.0016	3.1e-22	97.5156
rs4796243	17	35057883	A	G	0.3029	-0.0124	0.0019	6.1e-11	42.5928
rs8070454	17	38160754	T	C	0.3869	-0.0098	0.0017	4.2e-09	33.2318
rs16966801	17	39573713	A	G	0.7984	-0.0156	0.0022	1.1e-12	50.281
rs886444	17	46051911	A	G	0.3955	-0.0102	0.0017	8.4e-10	36
rs208015	17	46252346	T	C	0.0784	0.0356	0.0034	1.4e-25	109.633
rs9299	17	46669430	T	C	0.6471	0.0121	0.0018	3.6e-11	45.1883
rs11079849	17	47090785	T	C	0.3199	-0.0188	0.0019	4.8e-24	97.9058
rs8071182	17	55336155	A	G	0.1735	0.0133	0.0022	2.1e-09	36.5475
rs8075273	17	61728881	A	C	0.2815	-0.0133	0.0018	3.7e-13	54.5957
rs12602912	17	65870073	T	C	0.2048	0.0176	0.0021	9.9e-18	70.2404
rs2619976	17	71754545	T	C	0.4132	0.0104	0.0018	6.3e-09	33.3827
rs7209235	17	73759552	A	G	0.695	-0.0111	0.0019	8e-09	34.1302
rs8081039	17	75995829	T	C	0.0573	0.0233	0.0038	6.1e-10	37.5963
rs1285245	17	77796889	C	G	0.3669	-0.0121	0.0018	1.7e-11	45.1883
rs12939549	17	78611724	A	G	0.5665	0.018	0.0016	2.7e-28	126.562
rs4889782	17	78640510	T	C	0.6025	-0.015	0.0018	6.6e-17	69.4444
rs4969387	17	79081724	C	G	0.7463	-0.0145	0.002	4.3e-13	52.5625
rs9905991	17	80052073	A	G	0.4483	0.01	0.0017	8.3e-09	34.6021
rs1608445	18	947954	A	G	0.435	-0.0104	0.0018	3.7e-09	33.3827
rs8097544	18	1839564	A	G	0.8477	-0.02	0.0025	9.3e-16	64
rs12964689	18	21116998	A	G	0.5176	0.0203	0.0017	5.1e-32	142.592
rs1941697	18	31251276	A	G	0.4538	0.0123	0.0017	1.2e-12	52.3495
rs1365466	18	36182440	T	C	0.7406	-0.0137	0.0019	3.3e-13	51.9917
rs555267	18	40992698	T	G	0.33	0.0126	0.0017	6e-13	54.9343
rs954018	18	42598463	A	G	0.3053	-0.013	0.0018	2.1e-13	52.1605
rs10438964	18	42950629	T	C	0.2757	-0.0127	0.0019	7.6e-11	44.6787
rs7239114	18	45921214	A	G	0.5403	0.0124	0.0017	1.2e-13	53.2042
rs8092503	18	52479487	A	G	0.7685	-0.0165	0.0019	2.3e-17	75.4155
rs11659764	18	53335512	A	T	0.05297	-0.0253	0.0039	8.9e-11	42.0835
rs7243357	18	56883319	T	G	0.8272	0.0194	0.0021	9.1e-20	85.3424
rs2000746	18	57677294	A	G	0.7337	0.0181	0.002	7e-19	81.9025
rs1942866	18	57741783	C	G	0.6236	-0.031	0.0017	2e-75	332.526
rs8095404	18	57804346	A	T	0.5444	-0.0259	0.0017	1.1e-54	232.114
rs663129	18	57838401	A	G	0.2301	0.0545	0.0019	1.6e-178	822.784
rs8094523	18	57878155	A	G	0.08016	-0.0305	0.0032	4.7e-22	90.8447
rs9675376	18	57969244	A	G	0.2877	0.035	0.0018	2.7e-82	378.086
rs2229616	18	58039276	T	C	0.02017	-0.106	0.0059	4.7e-71	322.781
rs9951893	18	60739250	T	C	0.5249	-0.0115	0.0017	3.3e-11	45.7612
rs2012927	18	63297672	A	G	0.3348	0.0129	0.0017	7.4e-14	57.5813
rs8089514	18	69224478	A	T	0.359	0.0126	0.0019	1.1e-11	43.9778
rs11150911	18	73498528	A	C	0.2809	0.0133	0.0018	4.7e-13	54.5957
rs1787267	18	76742544	C	G	0.06268	-0.0237	0.0036	3.4e-11	43.3403
rs895330	19	4060707	C	G	0.8076	0.0201	0.0023	5.5e-19	76.3724
rs12609744	19	12994140	T	C	0.6931	-0.0126	0.0019	3.6e-11	43.9778
rs273504	19	18215247	A	G	0.5734	-0.0153	0.0018	4.4e-18	72.25
rs17724992	19	18454825	A	G	0.7404	0.0183	0.0019	1e-22	92.7673
rs757318	19	18820308	A	C	0.4805	-0.0185	0.0016	2.4e-29	133.691
rs998732	19	19378671	A	G	0.8422	0.0171	0.0022	2e-14	60.4153
rs2304130	19	19789528	A	G	0.9147	0.0176	0.003	2.9e-09	34.4178
rs8102137	19	30296853	T	C	0.6763	-0.0193	0.0018	1.7e-25	114.966
rs2866816	19	30683879	T	C	0.7393	0.0129	0.002	5.6e-11	41.6025
rs11668301	19	31016196	A	G	0.8482	0.021	0.0024	1.9e-18	76.5625
rs10408013	19	33963766	T	C	0.2908	0.0111	0.0018	8e-10	38.0278
rs29938	19	34311481	T	C	0.3275	-0.015	0.0017	6.7e-18	77.8547
rs3826705	19	42637232	T	C	0.8794	-0.0157	0.0027	6.6e-09	33.8121
rs2075650	19	45395619	A	G	0.8606	0.0244	0.0023	1.5e-25	112.544
rs11672660	19	46180184	T	C	0.2049	-0.034	0.0021	1.7e-60	262.132
rs3810291	19	47569003	A	G	0.6703	0.0274	0.0018	2.1e-52	231.716
rs1884389	20	1410582	T	C	0.4289	-0.0103	0.0017	4e-09	36.7093
rs676749	20	3026069	A	T	0.502	-0.0104	0.0017	1.7e-09	37.4256
rs1884897	20	6612832	A	G	0.3692	-0.0194	0.0017	1.3e-30	130.228
rs8123881	20	15819495	A	G	0.8701	-0.0196	0.0024	4.4e-16	66.6944
rs4814512	20	16564210	A	C	0.782	0.0133	0.0021	2.3e-10	40.1111
rs6138482	20	25059442	T	C	0.1974	0.0147	0.002	5.8e-13	54.0225
rs6121381	20	30785593	A	T	0.8469	-0.0147	0.0024	9.4e-10	37.5156
rs13041173	20	32542814	A	G	0.6586	-0.0107	0.0018	5e-09	35.3364
rs6142096	20	32686658	A	G	0.5278	0.0137	0.0017	1.8e-15	64.9446
rs2425241	20	35018412	T	C	0.06741	-0.0197	0.0033	2.7e-09	35.6373
rs2143253	20	41987392	A	G	0.1189	-0.0188	0.0026	1.1e-12	52.284
rs2425857	20	44914134	A	G	0.4409	0.0116	0.0017	2.8e-11	46.5606
rs6019482	20	47495560	T	C	0.1654	-0.0178	0.0023	2.8e-14	59.8941
rs17806379	20	51107290	T	C	0.1789	-0.0258	0.0022	1.5e-30	137.529
rs1512065	20	53453326	A	G	0.2371	0.0138	0.0021	5.7e-11	43.1837
rs559267	20	54157497	A	G	0.6642	-0.0115	0.0017	3e-11	45.7612
rs6011457	20	61530915	A	T	0.4975	-0.0116	0.0017	2.7e-11	46.5606
rs310618	20	62127121	T	C	0.6712	-0.0108	0.0018	5.5e-09	36
rs762147	21	39238610	A	G	0.2708	-0.0115	0.0019	3.3e-09	36.6343
rs13047416	21	40309436	C	G	0.6231	0.0154	0.0018	2.2e-17	73.1975
rs2836961	21	40627020	A	C	0.6165	-0.0102	0.0017	1.1e-09	36
rs2838006	21	42653567	T	C	0.3617	-0.0126	0.0018	5.4e-12	49
rs427943	21	46570896	A	C	0.4331	-0.017	0.0017	7.3e-23	100
rs4820408	22	40604945	T	G	0.408	0.0151	0.0017	2.1e-19	78.8962
rs9615905	22	48875699	T	C	0.45	0.011	0.0017	2.7e-10	41.8685

## Sheet: S3
Supplementary Table 3: instrumental variables for genetically predicted BMI from Locke et al. prior to clumping and data harmonisation (N=77)
SNP	Chromosome	Position	Effect allele	Other allele	Effect allele frequency	Beta	Standard error	P value	F statistic
rs657452	1	49589847	A	G	0.394	0.023	0.003	5.48e-13	58.7778
rs11583200	1	50559820	C	T	0.396	0.018	0.003	1.48e-08	36
rs3101336	1	72751185	C	T	0.613	0.033	0.003	2.66e-26	121
rs12566985	1	75002193	G	A	0.446	0.024	0.003	3.28e-15	64
rs12401738	1	78446761	A	G	0.352	0.021	0.003	1.15e-10	49
rs11165643	1	96924097	T	C	0.583	0.022	0.003	2.07e-12	53.7778
rs17024393	1	110154688	C	T	0.04	0.066	0.009	7.03e-14	53.7778
rs543874	1	177889480	G	A	0.193	0.048	0.004	2.62e-35	144
rs2820292	1	201784287	C	A	0.555	0.02	0.003	1.83e-10	44.4444
rs13021737	2	632348	G	A	0.828	0.06	0.004	1.11e-50	225
rs10182181	2	25150296	G	A	0.462	0.031	0.003	8.78e-24	106.778
rs11126666	2	26928811	A	G	0.283	0.021	0.003	1.33e-09	49
rs1016287	2	59305625	T	C	0.287	0.023	0.003	2.25e-11	58.7778
rs11688816	2	63053048	G	A	0.525	0.017	0.003	1.89e-08	32.1111
rs2121279	2	143043285	T	C	0.152	0.025	0.004	2.31e-08	39.0625
rs1528435	2	181550962	T	C	0.631	0.018	0.003	1.2e-08	36
rs7599312	2	213413231	G	A	0.724	0.022	0.003	1.17e-10	53.7778
rs6804842	3	25106437	G	A	0.575	0.019	0.003	2.48e-09	40.1111
rs2365389	3	61236462	C	T	0.582	0.02	0.003	1.63e-10	44.4444
rs3849570	3	81792112	A	C	0.359	0.019	0.003	2.6e-08	40.1111
rs13078960	3	85807590	G	T	0.196	0.03	0.004	1.74e-14	56.25
rs16851483	3	141275436	T	G	0.066	0.048	0.008	3.55e-10	36
rs1516725	3	185824004	C	T	0.872	0.045	0.005	1.89e-22	81
rs10938397	4	45182527	G	A	0.434	0.04	0.003	3.21e-38	177.778
rs17001654	4	77129568	G	C	0.153	0.031	0.005	7.76e-09	38.44
rs13107325	4	103188709	T	C	0.072	0.048	0.007	1.83e-12	47.0204
rs11727676	4	145659064	T	C	0.91	0.036	0.006	2.55e-08	36
rs2112347	5	75015242	T	G	0.629	0.026	0.003	6.19e-17	75.1111
rs205262	6	34563164	G	A	0.273	0.022	0.004	1.75e-10	30.25
rs2033529	6	40348653	G	A	0.293	0.019	0.003	1.39e-08	40.1111
rs2207139	6	50845490	G	A	0.177	0.045	0.004	4.13e-29	126.562
rs9400239	6	108977663	C	T	0.688	0.019	0.003	1.61e-08	40.1111
rs13191362	6	163033350	A	G	0.879	0.028	0.005	7.34e-09	31.36
rs1167827	7	75163169	G	A	0.553	0.02	0.003	6.33e-10	44.4444
rs2245368	7	76608143	C	T	0.18	0.032	0.006	3.19e-08	28.4444
rs17405819	8	76806584	T	C	0.7	0.022	0.003	2.07e-11	53.7778
rs2033732	8	85079709	C	T	0.747	0.019	0.004	4.89e-08	22.5625
rs4740619	9	15634326	T	C	0.542	0.018	0.003	4.56e-09	36
rs10968576	9	28414339	G	A	0.32	0.025	0.003	6.61e-14	69.4444
rs6477694	9	111932342	C	T	0.365	0.017	0.003	2.67e-08	32.1111
rs1928295	9	120378483	T	C	0.548	0.019	0.003	7.91e-10	40.1111
rs10733682	9	129460914	A	G	0.478	0.017	0.003	1.83e-08	32.1111
rs7899106	10	87410904	G	A	0.052	0.04	0.007	2.96e-08	32.6531
rs17094222	10	102395440	C	T	0.211	0.025	0.004	5.94e-11	39.0625
rs11191560	10	104869038	C	T	0.089	0.031	0.005	8.45e-09	38.44
rs7903146	10	114758349	C	T	0.713	0.023	0.003	1.11e-11	58.7778
rs4256980	11	8673939	G	C	0.646	0.021	0.003	2.9e-11	49
rs11030104	11	27684517	A	G	0.792	0.041	0.004	5.56e-28	105.062
rs2176598	11	43864278	T	C	0.251	0.02	0.004	2.97e-08	25
rs3817334	11	47650993	T	C	0.407	0.026	0.003	5.15e-17	75.1111
rs12286929	11	115022404	G	A	0.523	0.022	0.003	1.31e-12	53.7778
rs7138803	12	50247468	A	G	0.384	0.032	0.003	8.15e-24	113.778
rs11057405	12	122781897	G	A	0.901	0.031	0.006	2.02e-08	26.6944
rs12016871	13	28017782	T	C	0.203	0.03	0.005	2.29e-10	36
rs12429545	13	54102206	A	G	0.133	0.033	0.005	1.09e-12	43.56
rs10132280	14	25928179	C	A	0.682	0.023	0.003	1.14e-11	58.7778
rs12885454	14	29736838	C	A	0.642	0.021	0.003	1.94e-10	49
rs11847697	14	30515112	T	C	0.042	0.049	0.008	3.99e-09	37.5156
rs7141420	14	79899454	T	C	0.527	0.024	0.003	1.23e-14	64
rs3736485	15	51748610	A	G	0.454	0.018	0.003	7.41e-09	36
rs16951275	15	68077168	T	C	0.784	0.031	0.004	1.91e-17	60.0625
rs758747	16	3627358	T	C	0.265	0.023	0.004	7.47e-10	33.0625
rs12446632	16	19935389	G	A	0.865	0.04	0.005	1.48e-18	64
rs2650492	16	28333411	A	G	0.303	0.021	0.004	1.92e-09	27.5625
rs3888190	16	28889486	A	C	0.403	0.031	0.003	3.14e-23	106.778
rs9925964	16	31129895	A	G	0.62	0.019	0.003	8.11e-10	40.1111
rs1558902	16	53803574	A	T	0.415	0.082	0.003	7.51e-153	747.111
rs1000940	17	5283252	G	A	0.32	0.019	0.003	1.28e-08	40.1111
rs12940622	17	78615571	G	A	0.575	0.018	0.003	2.49e-09	36
rs1808579	18	21104888	C	T	0.534	0.017	0.003	4.17e-08	32.1111
rs7243357	18	56883319	T	G	0.812	0.022	0.004	3.86e-08	30.25
rs6567160	18	57829135	C	T	0.236	0.056	0.004	3.93e-53	196
rs17724992	19	18454825	A	G	0.746	0.019	0.004	3.42e-08	22.5625
rs29941	19	34309532	G	A	0.669	0.018	0.003	2.41e-08	36
rs2075650	19	45395619	A	G	0.848	0.026	0.005	1.25e-08	27.04
rs2287019	19	46202172	C	T	0.804	0.036	0.004	4.59e-18	81
rs3810291	19	47569003	A	G	0.666	0.028	0.004	4.81e-15	49

## Sheet: S4
Supplementary Table 4: instrumental variables for genetically predicted IL-6 signaling from UK Biobank GWAS (CRP as proxy for IL-6 signaling) prior to clumping and data harmonisation (N=14)
SNP	Chromosome	Position	Effect allele	Other allele	Effect allele frequency	Beta	Standard error	P value	F statistic
rs35221765	1	154345344	A	G	0.261144	0.074609	0.012022	5.435e-10	38.5149
rs12083537	1	154381103	G	A	0.22074	-0.17571	0.012766	4.2901e-43	189.445
rs145909430	1	154391504	C	T	0.0217833	-0.29683	0.037801	4.0904e-15	61.6608
rs7525477	1	154394297	A	G	0.44215	0.068993	0.011149	6.0899e-10	38.2947
rs12730935	1	154419892	A	G	0.409648	-0.23501	0.010754	8.3767e-106	477.565
rs14021	1	154452204	C	T	0.161157	0.1596	0.014401	1.5418e-28	122.823
rs140615642	1	154469825	C	T	0.0198453	-0.22363	0.038779	8.093e-09	33.2558
rs56100876	1	154496473	A	G	0.0186742	-0.26519	0.040148	3.9699e-11	43.6301
rs77994623	1	154505106	T	C	0.166794	0.10771	0.014158	2.79e-14	57.8773
rs11264224	1	154568086	C	A	0.171658	-0.086671	0.014302	1.3624e-09	36.7243
rs12059682	1	154579585	C	T	0.205985	0.1158	0.013054	7.314e-19	78.6919
rs188727323	1	154617961	T	C	0.813961	-0.11925	0.014706	5.1163e-16	65.7548
rs1876304	1	154633513	T	G	0.19804	0.10969	0.013322	1.813e-16	67.7946
rs34693607	1	154661369	G	C	0.213571	-0.10201	0.012888	2.4789e-15	62.649

## Sheet: S5
Supplementary Table 5: instrumental variables for genetically predicted IL-6 signaling from CHARGE Inflammation Working Group (CRP as proxy for IL-6 signaling) prior to clumping and data harmonisation (N=7)
SNP	Chromosome	Position	Effect allele	Other allele	Effect allele frequency	Beta	Standard error	P value	F statistic
rs73026617	1	154369981	T	C	0.097	0.0474	0.0068	3.16e-12	48.5891
rs12083537	1	154381103	A	G	0.193	0.0643	0.0053	7.14e-34	147.187
rs4556348	1	154394296	T	C	0.148	0.0541	0.0067	6.77e-16	65.1996
rs2228145	1	154426970	A	C	0.36	0.0899	0.0042	1.21e-101	458.164
rs11264224	1	154568086	A	C	0.193	0.0465	0.0057	3.41e-16	66.5512
rs12059682	1	154579585	T	C	0.196	-0.0441	0.0049	2.26e-19	81
rs34693607	1	154661369	C	G	0.184	0.0368	0.0057	1.07e-10	41.6817

## Sheet: S6
Supplementary Table 6: instrumental variables for genetically predicted IL-6 levels from CHARGE Inflammation Working Group prior to clumping and data harmonisation (N=3)
SNP	Chromosome	Position	Effect allele	Other allele	Effect allele frequency	Beta*	Standard error*	P value*	F statistic
rs4537545	1	154418879	T	C	0.39	0.091	0.005	8.39e-85	331.24
rs6734238	2	113841030	G	A	0.42	0.025	0.005	1.45e-07	25
rs660895	6	32577380	G	A	0.19	0.036	0.006	1.8e-09	36
* in discovery cohort

## Sheet: S7
Supplementary Table 7: instrumental variables for genetically predicted CRP levels from CHARGE Inflammation Working Group prior to clumping and data harmonisation (N=178)
SNP	Chromosome	Position	Effect allele	Other allele	Beta	Standard error	P value	F statistic
rs75460349	1	27180088	A	C	0.0865	0.0139	4.8767e-10	38.726
rs4660293	1	40028180	A	G	-0.0375	0.0049	1.9625e-14	58.5693
rs6672992	1	65848034	A	C	-0.0444	0.0055	6.8745e-16	65.1689
rs3934256	1	65904455	C	G	-0.0557	0.0042	3.84991e-40	175.878
rs147501551	1	66037512	A	G	0.0879	0.0053	8.96063e-62	275.059
rs76912411	1	66040934	A	T	-0.0797	0.0093	1.03582e-17	73.4431
rs80343559	1	66088716	T	C	0.1444	0.0257	1.92425e-08	31.5695
rs13375019	1	66123136	C	G	-0.1037	0.0042	1.35358e-134	609.62
rs112585178	1	66154563	T	G	-0.0875	0.0156	2.03529e-08	31.4606
rs72683201	1	66225711	T	C	0.161	0.016	8.0917e-24	101.254
rs12038590	1	66270794	T	C	0.0432	0.0046	5.92618e-21	88.1966
rs10789203	1	66305031	T	C	-0.0439	0.0042	1.42892e-25	109.252
rs72685056	1	66397344	A	G	-0.052	0.0077	1.44573e-11	45.6063
rs12727285	1	66485442	A	C	0.036	0.0046	5.03289e-15	61.2476
rs80255322	1	66519663	A	G	-0.1264	0.0184	6.43979e-12	47.1909
rs937605	1	66626040	T	C	-0.0256	0.0044	5.94912e-09	33.8512
rs469773	1	91530259	T	C	-0.0339	0.0051	2.99008e-11	44.1834
rs12735458	1	154361406	A	G	0.126	0.0183	5.76878e-12	47.4066
rs73026617	1	154369981	T	C	0.0474	0.0068	3.15618e-12	48.5891
rs12083537	1	154381103	A	G	0.0643	0.0053	7.14162e-34	147.187
rs7525477	1	154394297	A	G	0.0382	0.0051	6.87708e-14	56.103
rs113580743	1	154420333	A	G	0.0708	0.0112	2.59156e-10	39.9605
rs2228145	1	154426970	A	C	0.0899	0.0042	1.20635e-101	458.164
rs16836054	1	154462195	A	G	0.0453	0.0054	4.90758e-17	70.3735
rs75631461	1	154498153	T	C	0.1801	0.0262	6.24062e-12	47.2525
rs183641528	1	154499328	A	G	-0.1034	0.0178	6.28513e-09	33.7444
rs11264224	1	154568086	A	C	0.0465	0.0057	3.40914e-16	66.5512
rs12059682	1	154579585	T	C	-0.0441	0.0049	2.25718e-19	81
rs34693607	1	154661369	C	G	0.0368	0.0057	1.07407e-10	41.6817
rs71632652	1	159156916	A	C	-0.0921	0.0116	2.02744e-15	63.0381
rs862988	1	159160880	A	G	-0.0252	0.0045	2.14352e-08	31.36
rs862993	1	159164846	C	G	-0.0869	0.012	4.43204e-13	52.4417
rs863014	1	159200129	A	C	0.0351	0.0043	3.27371e-16	66.6312
rs115984621	1	159244544	A	G	-0.1123	0.0126	4.98053e-19	79.4362
rs149913193	1	159317442	A	T	0.1061	0.0094	1.51737e-29	127.402
rs115615753	1	159359030	T	C	-0.081	0.0125	9.17226e-11	41.9904
rs75790512	1	159377328	A	G	0.1546	0.0154	1.02751e-23	100.781
rs55688443	1	159447163	T	G	-0.1418	0.0157	1.68798e-19	81.5743
rs6686576	1	159464647	A	G	0.0709	0.0101	2.22183e-12	49.2776
rs112689575	1	159550965	A	G	0.1203	0.0127	2.73379e-21	89.7271
rs12121280	1	159554481	A	T	-0.0613	0.0102	1.85748e-09	36.1177
rs35485101	1	159566170	A	T	0.1125	0.0094	5.22199e-33	143.235
rs149327578	1	159576889	A	G	-0.0926	0.0094	6.78223e-23	97.0435
rs2794506	1	159585560	A	G	-0.0439	0.0049	3.27091e-19	80.267
rs12026296	1	159608991	T	C	0.0976	0.0083	6.34545e-32	138.275
rs895582	1	159637919	A	G	0.0891	0.0047	3.83305e-80	359.385
rs35370436	1	159639929	A	G	-0.075	0.0089	3.54742e-17	71.0138
rs72698563	1	159647250	A	T	-0.161	0.0127	7.91426e-37	160.711
rs17459069	1	159648693	T	C	-0.1416	0.0147	5.82069e-22	92.788
rs151313645	1	159655933	A	C	-0.1315	0.0183	6.68185e-13	51.6356
rs116247097	1	159658880	A	G	-0.176	0.0251	2.35016e-12	49.1675
rs116337989	1	159664302	A	G	0.1447	0.0236	8.71332e-10	37.5935
rs2808624	1	159665921	C	G	0.1712	0.0042	0	1661.53
rs113188187	1	159677904	T	C	0.1943	0.0171	6.42246e-30	129.108
rs3093070	1	159680817	T	G	-0.1556	0.0181	8.20517e-18	73.903
rs1800947	1	159683438	C	G	0.2979	0.0099	6.372e-199	905.463
rs3093059	1	159685136	A	G	-0.2235	0.0083	1.04071e-159	725.102
rs116702045	1	159700972	A	G	-0.1764	0.0115	4.18767e-53	235.289
rs4656848	1	159714760	A	G	-0.0618	0.0043	7.74546e-47	206.557
rs139996812	1	159722094	A	G	0.2404	0.0335	7.17179e-13	51.4967
rs115585839	1	159726586	T	G	0.1927	0.0198	2.19521e-22	94.7181
rs3806186	1	159749110	T	G	0.0334	0.0048	3.44322e-12	48.4184
rs7521729	1	159844819	A	C	0.0388	0.0065	2.38375e-09	35.6317
rs10754557	1	247599232	A	G	-0.0392	0.005	4.50546e-15	61.4656
rs67090117	1	247602308	T	G	-0.0427	0.0042	2.79304e-24	103.361
rs10802504	1	247613630	T	C	-0.0546	0.0076	6.75966e-13	51.6129
rs4925663	1	247614617	T	C	0.0349	0.0043	4.80695e-16	65.874
rs4362022	1	247616319	T	C	-0.0369	0.006	7.74829e-10	37.8225
rs117775558	1	247637458	T	C	-0.0398	0.0064	5.01131e-10	38.6729
rs62105327	2	639060	A	T	0.032	0.0054	3.10543e-09	35.1166
rs12467466	2	27009478	T	C	-0.0274	0.005	4.25326e-08	30.0304
rs76755654	2	27487805	A	G	-0.0425	0.0072	3.57432e-09	34.8428
rs111242383	2	27611546	A	T	-0.0862	0.0125	5.34872e-12	47.5548
rs1260326	2	27730940	T	C	0.0692	0.0042	5.44069e-61	271.465
rs116361102	2	27732845	A	G	0.0845	0.0154	4.08787e-08	30.1073
rs141428740	2	27735033	A	G	0.0683	0.0102	2.14087e-11	44.8375
rs2141371	2	27860258	A	G	0.0398	0.0048	1.11673e-16	68.7517
rs4666042	2	28421461	A	G	0.0275	0.0049	1.99719e-08	31.4973
rs2279990	2	28636740	A	G	0.024	0.0043	2.38597e-08	31.152
rs11694915	2	102710068	A	T	-0.0257	0.0044	5.19167e-09	34.1162
rs1115282	2	102890970	T	C	0.0245	0.0041	2.29231e-09	35.7079
rs6734238	2	113841030	A	G	-0.0457	0.0041	7.46114e-29	124.241
rs315953	2	113890003	T	C	-0.0282	0.0044	1.4639e-10	41.0764
rs10049413	3	49892896	A	G	-0.0282	0.0045	3.68859e-10	39.2711
rs7356034	3	170732599	A	G	0.0268	0.0045	2.5919e-09	35.4686
rs2161374	5	172176886	T	C	-0.0235	0.0042	2.20319e-08	31.3067
rs34471628	5	172196752	A	G	-0.0774	0.0117	3.70587e-11	43.7633
rs9268786	6	32420855	T	C	-0.0347	0.0063	3.63064e-08	30.3374
rs2647062	6	32570417	A	C	-0.0454	0.0074	8.50868e-10	37.6399
rs1490384	6	126851160	T	C	-0.026	0.0041	2.27593e-10	40.2142
rs13241897	7	22745351	A	G	0.0312	0.0042	1.09777e-13	55.1837
rs12673996	7	22833400	T	C	-0.0284	0.005	1.34695e-08	32.2624
rs7797566	7	72896395	A	C	0.0499	0.0064	6.3459e-15	60.7913
rs2921092	8	8359387	T	C	-0.0262	0.0045	5.80703e-09	33.8983
rs17155242	8	8966606	A	G	0.0328	0.0049	2.17333e-11	44.808
rs57310854	8	9057292	A	G	-0.028	0.0047	2.56209e-09	35.4912
rs7831128	8	9108101	A	T	-0.0436	0.0069	2.63533e-10	39.9277
rs7012637	8	9173209	A	G	0.0542	0.0043	1.99051e-36	158.877
rs9987289	8	9183358	A	G	-0.0636	0.0071	3.31381e-19	80.2412
rs4840410	8	9234069	A	G	-0.0299	0.0052	8.92434e-09	33.0625
rs56738120	8	9652308	T	C	0.0376	0.0067	2.0007e-08	31.4939
rs12676847	8	10183210	C	G	-0.0334	0.006	2.59658e-08	30.9878
rs1534862	8	11643803	T	C	-0.0321	0.005	1.36274e-10	41.2164
rs1908814	8	11755055	A	C	0.0375	0.0049	1.9625e-14	58.5693
rs6987444	8	117076315	A	G	0.0343	0.0042	3.17027e-16	66.6944
rs10956251	8	126513330	T	C	0.0382	0.0064	2.39078e-09	35.626
rs505922	9	136149229	T	C	-0.0263	0.0043	9.57855e-10	37.4089
rs10832027	11	13357183	A	G	0.0273	0.0043	2.16948e-10	40.3077
rs4752829	11	47396654	A	G	-0.0264	0.0046	9.51639e-09	32.9376
rs1582763	11	60021948	A	G	-0.0264	0.0043	8.27634e-10	37.6939
rs12813389	12	95913562	A	T	-0.0329	0.0041	1.02031e-15	64.3908
rs4764726	12	103512325	C	G	0.0272	0.0043	2.52281e-10	40.013
rs12426126	12	120571614	T	C	0.0537	0.0077	3.07997e-12	48.637
rs1182859	12	120693288	A	G	0.0464	0.0067	4.34828e-12	47.9608
rs7960743	12	120720038	T	C	-0.034	0.0057	2.44765e-09	35.5802
rs139088741	12	120780818	T	C	-0.0847	0.0132	1.3929e-10	41.1736
rs2516079	12	120859188	T	G	0.032	0.0048	2.61678e-11	44.4444
rs2673617	12	121095566	T	C	-0.0578	0.0042	4.31993e-43	189.39
rs189117855	12	121178214	A	C	-0.1036	0.0148	2.55963e-12	49
rs80252785	12	121186537	A	G	-0.0801	0.0087	3.3569e-20	84.7669
rs2203474	12	121232400	T	G	0.1219	0.0103	2.57492e-32	140.066
rs73229142	12	121257090	T	C	-0.0699	0.0107	6.459e-11	42.6763
rs142778000	12	121370331	A	G	0.1187	0.0207	9.79162e-09	32.8822
rs28380723	12	121396646	T	C	-0.0717	0.0042	2.422e-65	291.434
rs7979478	12	121420263	A	G	-0.1478	0.0042	2.79653e-271	1238.37
rs1169282	12	121420430	T	C	-0.166	0.0154	4.31526e-27	116.192
rs56156770	12	121421992	T	C	0.1065	0.0169	2.94256e-10	39.7124
rs56404471	12	121424451	T	C	0.142	0.0138	7.82941e-25	105.881
rs80322811	12	121424751	C	G	0.0885	0.0153	7.2809e-09	33.4583
rs55961602	12	121430329	T	C	0.0699	0.0086	4.36766e-16	66.0629
rs74876709	12	121450013	A	G	0.1098	0.0188	5.20677e-09	34.1106
rs2259835	12	121461098	T	C	-0.0662	0.0047	4.68952e-45	198.39
rs74950833	12	121464747	C	G	-0.1593	0.024	3.19048e-11	44.0564
rs76102919	12	121464894	T	C	-0.1393	0.0204	8.58481e-12	46.6275
rs2393750	12	121477612	T	C	-0.0586	0.0042	3.04275e-44	194.669
rs140124176	12	121483363	T	C	-0.1475	0.0212	3.46248e-12	48.4075
rs11065422	12	121512148	A	G	-0.0465	0.0051	7.6773e-20	83.1315
rs4766984	12	121535209	A	G	-0.1094	0.0107	1.5434e-24	104.536
rs11065442	12	121563896	A	C	0.0366	0.0056	6.33067e-11	42.7156
rs3886929	12	121593600	A	C	-0.0588	0.0085	4.59207e-12	47.8538
rs76521059	12	121601376	I	R	0.0279	0.0049	1.24186e-08	32.4202
rs11065464	12	121602135	A	C	0.0456	0.0048	2.0989e-21	90.25
rs2686344	12	121690548	T	C	-0.046	0.0049	6.12926e-21	88.1299
rs2393844	12	121703618	A	G	-0.0466	0.0081	8.76287e-09	33.098
rs4480616	12	121703790	A	C	-0.0384	0.0045	1.4219e-17	72.8178
rs2239222	14	73011885	A	G	-0.0379	0.0044	7.07789e-18	74.1947
rs78715582	14	94770184	T	C	0.0324	0.0058	2.32083e-08	31.2057
rs112635299	14	94838142	T	G	-0.1066	0.0168	2.22082e-10	40.262
rs1189402	15	53728154	A	G	0.025	0.0042	2.64269e-09	35.4308
rs340005	15	60878030	A	G	0.0363	0.0043	3.12326e-17	71.265
rs1874467	16	51090601	C	G	0.0329	0.0057	7.83688e-09	33.3152
rs116971887	16	51170026	T	G	-0.1128	0.0122	2.33266e-20	85.4867
rs1965024	16	51173559	A	G	-0.039	0.0044	7.74461e-19	78.564
rs2110840	16	51410819	A	C	-0.0586	0.0075	5.5695e-15	61.0482
rs7204926	16	51705448	T	C	0.038	0.0067	1.41435e-08	32.1675
rs55872725	16	53809123	T	C	0.0309	0.0042	1.87888e-13	54.1276
rs1292056	17	57959047	T	C	-0.0229	0.0042	4.96998e-08	29.7285
rs2384955	17	72695167	T	C	-0.0384	0.0059	7.59178e-11	42.3602
rs2847286	18	12817815	A	G	-0.0252	0.0042	1.97318e-09	36
rs2927439	19	45242740	A	G	-0.0333	0.0047	1.38938e-12	50.1987
rs28399637	19	45324138	A	G	-0.0676	0.006	1.9169e-29	126.938
rs28399664	19	45324756	C	G	0.2967	0.0185	6.95333e-58	257.212
rs2927482	19	45340138	A	G	-0.0286	0.0049	5.32338e-09	34.0675
rs55840414	19	45343579	A	G	0.0433	0.0076	1.21671e-08	32.46
rs2972558	19	45356141	T	C	-0.0392	0.005	4.50546e-15	61.4656
rs138607350	19	45363820	T	G	0.2089	0.0243	8.20355e-18	73.9034
rs6859	19	45382034	A	G	-0.0508	0.0044	7.78289e-31	133.298
rs117310449	19	45393516	T	C	-0.2891	0.0308	6.21075e-21	88.1038
rs1160984	19	45403924	T	C	0.0562	0.0097	6.88055e-09	33.5683
rs449647	19	45408564	A	T	-0.0674	0.007	6.05656e-22	92.7094
rs440446	19	45409167	C	G	0.0727	0.0046	2.9038e-56	249.777
rs429358	19	45411941	T	C	0.2467	0.0064	0	1485.86
rs7412	19	45412079	T	C	0.058	0.009	1.16025e-10	41.5309
rs72654472	19	45414392	T	G	0.1236	0.0197	3.51636e-10	39.3645
rs147188206	19	45552587	T	C	0.2345	0.0305	1.48841e-14	59.1134
rs1800961	20	43042364	T	C	-0.099	0.0125	2.37511e-15	62.7264
rs4817984	21	40465066	A	C	-0.0391	0.0047	8.85972e-17	69.2082
rs4821816	22	39113134	A	G	-0.0276	0.0044	3.54778e-10	39.3471

## Sheet: S8
Supplementary Table 8: instrumental variables for genetically predicted CRP levels from CHARGE Inflammation Working Group within 300kb of the CRP gene prior to clumping and data harmonisation (N=26)
SNP	Chromosome	Position	Effect allele	Other allele	Beta	Standard error	P value	F statistic
rs55688443	1	159447163	T	G	-0.1418	0.0157	1.68798e-19	81.5743
rs6686576	1	159464647	A	G	0.0709	0.0101	2.22183e-12	49.2776
rs112689575	1	159550965	A	G	0.1203	0.0127	2.73379e-21	89.7271
rs12121280	1	159554481	A	T	-0.0613	0.0102	1.85748e-09	36.1177
rs35485101	1	159566170	A	T	0.1125	0.0094	5.22199e-33	143.235
rs149327578	1	159576889	A	G	-0.0926	0.0094	6.78223e-23	97.0435
rs2794506	1	159585560	A	G	-0.0439	0.0049	3.27091e-19	80.267
rs12026296	1	159608991	T	C	0.0976	0.0083	6.34545e-32	138.275
rs895582	1	159637919	A	G	0.0891	0.0047	3.83305e-80	359.385
rs35370436	1	159639929	A	G	-0.075	0.0089	3.54742e-17	71.0138
rs72698563	1	159647250	A	T	-0.161	0.0127	7.91426e-37	160.711
rs17459069	1	159648693	T	C	-0.1416	0.0147	5.82069e-22	92.788
rs151313645	1	159655933	A	C	-0.1315	0.0183	6.68185e-13	51.6356
rs116247097	1	159658880	A	G	-0.176	0.0251	2.35016e-12	49.1675
rs116337989	1	159664302	A	G	0.1447	0.0236	8.71332e-10	37.5935
rs2808624	1	159665921	C	G	0.1712	0.0042	0	1661.53
rs113188187	1	159677904	T	C	0.1943	0.0171	6.42246e-30	129.108
rs3093070	1	159680817	T	G	-0.1556	0.0181	8.20517e-18	73.903
rs1800947	1	159683438	C	G	0.2979	0.0099	6.372e-199	905.463
rs3093059	1	159685136	A	G	-0.2235	0.0083	1.04071e-159	725.102
rs116702045	1	159700972	A	G	-0.1764	0.0115	4.18767e-53	235.289
rs4656848	1	159714760	A	G	-0.0618	0.0043	7.74546e-47	206.557
rs139996812	1	159722094	A	G	0.2404	0.0335	7.17179e-13	51.4967
rs115585839	1	159726586	T	G	0.1927	0.0198	2.19521e-22	94.7181
rs3806186	1	159749110	T	G	0.0334	0.0048	3.44322e-12	48.4184
rs7521729	1	159844819	A	C	0.0388	0.0065	2.38375e-09	35.6317

## Sheet: S9
Supplementary Table 9: instrumental variables for genetically predicted risk of MS from International Multiple Sclerosis Genetics Consortium prior to clumping and data harmonisation (N=138)
SNP	Chromosome	Position	Effect allele	Other allele	Effect allele frequency	OR	P value
rs6670198	1	2520527	T	C	0.666	1.156	2.03e-16
rs2986736	1	6512547	C	T	0.201	1.112	3.41e-05
rs1801133	1	11856378	G	A	0.7546	1.082	0.0002721
rs67934705	1	24207504	G	A	0.567	1.234	1.01e-05
rs6672420	1	25291010	A	T	0.505	1.073	2.23e-05
chr1:32738415	1	32738415	A	G	0.153	1.145	5.04e-07
rs72922276	1	65429319	G	A	0.902	1.141	6.88e-06
rs35486093	1	85729820	G	A	0.084	1.197	1.6e-10
rs11809700	1	93152635	T	C	0.277	1.155	3.51e-15
rs34723276	1	101290432	A	G	0.711	1.218	1.36e-14
rs10801908	1	117090493	C	T	0.868	1.24	3.54e-16
rs483180	1	120267505	C	G	0.673	1.114	1.77e-09
rs2317231	1	157686337	G	T	0.541	1.106	1.9e-09
rs3737798	1	160389984	A	G	0.53	1.091	1.4e-07
rs1323292	1	192541021	A	G	0.81	1.132	1.4e-08
rs59655222	1	200875897	T	C	0.741	1.131	3.76e-11
rs9308424	1	212877776	G	A	0.698	1.096	1.34e-06
rs11899404	2	12607893	C	T	0.562	1.109	0.0007573
rs13414105	2	30472442	C	A	0.809	1.105	9.4e-06
rs12478539	2	43355324	G	C	0.735	1.131	4.37e-11
rs1177228	2	61242410	G	A	0.739	1.113	8.57e-09
rs13385171	2	65661843	C	T	0.602	1.072	2.42e-05
rs12622670	2	68646536	T	C	0.55	1.113	1.04e-10
rs57116599	2	112770799	G	A	0.744	1.128	2.59e-09
rs10191360	2	136884679	T	C	0.476	1.102	3.19e-05
rs962052	2	151644203	C	T	0.3	1.07	0.0002103
rs6738544	2	191989356	C	A	0.661	1.068	9.49e-05
rs35540610	2	231121829	C	T	0.224	1.145	2.88e-12
rs9863496	3	18798848	C	T	0.251	1.068	0.0003101
rs438613	3	28072086	C	T	0.488	1.148	9.43e-17
rs11919880	3	32962051	A	G	0.584	1.073	1.97e-05
rs9878602	3	71535338	T	G	0.515	1.087	2.6e-07
rs4325907	3	101749022	C	T	0.339	1.104	3.68e-09
rs2289746	3	105455955	C	T	0.646	1.089	1.48e-06
rs9843355	3	119228508	G	A	0.838	1.143	4.73e-10
rs71329256	3	121765368	C	G	0.529	1.154	6.34e-15
rs6789653	3	141150990	G	A	0.668	1.067	0.0002778
rs1014486	3	159691112	C	T	0.471	1.111	1.36e-10
rs10936602	3	169536637	T	C	0.743	1.115	1.68e-08
rs13066789	3	187987624	C	T	0.447	1.072	3.17e-05
rs6837324	4	48127262	G	A	0.38	1.09	3.16e-07
rs2705616	4	87862396	C	G	0.458	1.086	4.35e-07
rs2726479	4	106255589	C	T	0.566	1.082	1.18e-06
rs9992763	4	109058718	G	T	0.451	1.094	4.51e-08
rs17051321	4	122119449	T	C	0.216	1.099	4.95e-07
rs72989863	4	164493807	G	A	0.629	1.07	7.01e-05
rs34681760	5	6712834	C	T	0.643	1.084	5.28e-06
rs10063294	5	35877505	G	A	0.429	1.104	1.13e-09
rs11749040	5	40396425	A	G	0.131	1.217	3.54e-17
rs7731626	5	55444683	G	A	0.625	1.097	2.85e-06
rs2084007	5	133891282	C	T	0.5	1.083	1.15e-06
rs249677	5	141539339	A	C	0.623	1.08	8.99e-06
rs2546890	5	158759900	A	G	0.503	1.124	1.04e-12
rs67111717	5	176790162	G	A	0.342	1.1	4.96e-07
rs12211604	6	7100029	G	A	0.384	1.098	1.86e-07
chr6:14691215	6	14691215	C	T	0.93	1.327	2.97e-06
rs719316	6	16672760	T	C	0.536	1.067	7.05e-05
rs1076928	6	36348689	T	C	0.459	1.079	4.22e-06
rs72928038	6	90976768	A	G	0.179	1.174	9.01e-11
chr6:119215402	6	119215402	A	C	0.619	1.083	8.15e-06
rs802730	6	128280104	T	C	0.722	1.121	3.24e-10
rs4896153	6	135833463	T	A	0.511	1.148	1.65e-13
rs62420820	6	137438057	A	G	0.226	1.147	2.5e-13
rs6911131	6	143865221	G	A	0.061	1.157	3.09e-05
rs1738074	6	159465977	C	T	0.548	1.12	9.91e-12
rs55858457	7	2443302	T	G	0.376	1.12	1.2e-08
rs10245867	7	28142186	T	G	0.323	1.065	0.00033
rs60600003	7	37382465	G	T	0.102	1.143	4.2e-07
chr7:50328339	7	50328339	A	G	0.962	1.589	4.17e-08
rs73414214	7	105706462	C	A	0.904	1.109	0.0003744
rs4728142	7	128573967	A	G	0.451	1.063	0.0002585
rs10271373	7	138729795	A	C	0.497	1.073	1.65e-05
rs354033	7	149289464	G	A	0.74	1.114	1.21e-08
rs28703878	8	79417222	G	A	0.309	1.143	4.51e-10
rs6990534	8	128814091	G	A	0.67	1.113	3.6e-09
rs3923387	8	144986793	T	C	0.425	1.073	2.35e-05
rs7855251	9	100868189	T	C	0.731	1.116	4.23e-08
rs11256593	10	6117322	T	C	0.561	1.205	6.78e-27
rs1087056	10	31395761	A	G	0.42	1.081	3.12e-06
rs17741873	10	75653800	G	T	0.809	1.093	2.15e-05
rs1250551	10	81059335	T	G	0.31	1.123	2.66e-11
rs1112718	10	94479107	A	G	0.591	1.111	2.46e-10
rs35218683	11	321138	T	C	0.276	1.308	1.56e-08
rs61884005	11	14402930	C	G	0.854	1.144	8.02e-08
rs1365120	11	36438075	C	T	0.108	1.127	5.76e-06
rs2269434	11	47360412	C	T	0.35	1.09	5.24e-07
rs4939490	11	60793651	G	C	0.391	1.146	4.25e-15
rs11231749	11	64095178	C	T	0.296	1.076	2.34e-05
rs531612	11	65705432	T	C	0.526	1.092	9.41e-08
rs4409785	11	95311422	C	T	0.189	1.094	2.09e-05
rs12365699	11	118743286	G	A	0.847	1.155	3.15e-10
rs6589939	11	122518525	G	A	0.38	1.078	8.67e-06
rs4262739	11	128421175	G	A	0.545	1.069	5.37e-05
rs1800693	12	6440009	C	T	0.43	1.135	1.02e-13
rs7977720	12	9866349	T	C	0.47	1.107	3.96e-10
rs701006	12	58106836	G	A	0.592	1.121	1.35e-11
rs61708525	12	94661453	G	A	0.315	1.083	1.91e-05
rs3184504	12	111884608	T	C	0.466	1.071	3.45e-05
rs7975763	12	123604053	T	C	0.215	1.129	7.8e-09
rs9591325	13	50811220	T	C	0.95	1.237	4.16e-10
chr13:100026952	13	100026952	A	C	0.968	1.777	4.07e-07
rs11852059	14	52306091	C	A	0.181	1.101	3.02e-06
rs12434551	14	69253364	A	T	0.542	1.11	1.83e-10
rs34695601	14	76014298	T	C	0.76	1.116	3.17e-08
chr14:88523488	14	88523488	C	T	0.949	1.347	2.09e-12
rs12147246	14	103265844	A	G	0.351	1.104	4.29e-09
rs62013236	15	79247482	C	T	0.846	1.133	2.07e-06
rs6496663	15	90887584	C	A	0.318	1.106	2.78e-08
rs405343	16	1067832	T	G	0.174	1.126	4.72e-08
chr16:11213951	16	11213951	C	T	0.459	1.206	4.65e-24
rs3809627	16	30103160	C	A	0.571	1.102	3.25e-08
rs8062446	16	57077094	T	C	0.4	1.089	8.41e-07
rs12925972	16	79111297	C	T	0.526	1.099	3.07e-08
rs35703946	16	86021505	G	A	0.858	1.188	1.94e-09
rs4796224	17	34842521	G	A	0.457	1.089	1.62e-07
rs9909593	17	37970149	G	A	0.492	1.074	1.16e-05
rs1026916	17	40529835	A	G	0.377	1.138	1.02e-13
rs7222450	17	43407670	A	G	0.464	1.103	1.78e-08
rs11079784	17	45702280	C	T	0.525	1.113	4.34e-11
rs2150879	17	57859210	G	A	0.441	1.109	3.29e-10
rs9900529	17	73335776	C	G	0.255	1.099	1.11e-06
rs9955954	18	56348044	A	G	0.785	1.116	1.54e-08
rs12971909	19	4466466	A	G	0.372	1.09	8.98e-06
rs1077667	19	6668972	C	T	0.763	1.164	8.37e-13
rs28834106	19	10592144	T	C	0.764	1.138	3.79e-11
rs58166386	19	16559421	G	A	0.3	1.095	2.54e-07
rs4808760	19	18301979	C	G	0.722	1.144	4.84e-13
rs7260482	19	45143942	C	A	0.263	1.093	1.84e-06
rs11083862	19	47638539	A	T	0.447	1.106	4.07e-09
rs1465697	19	49837246	T	C	0.238	1.132	3.48e-11
rs4812772	20	42579051	C	T	0.72	1.07	0.0002541
rs6032662	20	44734310	C	T	0.252	1.143	2.85e-13
rs2248137	20	52789743	C	G	0.6	1.119	7.81e-11
rs6742	20	62374441	C	T	0.782	1.173	1.3e-07
rs9610458	22	22205353	T	C	0.536	1.121	4.57e-12
rs4820955	22	31622539	A	T	0.436	1.123	1.82e-05
rs760517	22	37258986	C	T	0.584	1.088	6.62e-06
rs140522	22	50971266	T	C	0.34	1.117	2.85e-10

## Sheet: S10
Supplementary Table 10: Single nucleotide polymorphisms (SNPs) used to construct the instruments for Mendelian randomization analysis BMI (Yengo et al.) – multiple sclerosis (N=588)
					Exposure: BMI			Outcome: Multiple sclerosis
SNP	Chromosome	Position	Effect allele	Other allele	Beta	Standard error	P value	Beta	Standard error	P value
rs12044597	1	1708801	A	G	-0.0143	0.0016	1.7e-18	0.056782	0.0170134	0.0008454
rs7535528	1	2444414	A	G	-0.0152	0.0018	1.4e-16	0.0703152	0.01686	3.039e-05
rs6577584	1	6715390	T	G	-0.0131	0.0018	3.7e-13	-0.0295588	0.0169868	0.08184
rs7556169	1	8741401	A	G	-0.0103	0.0018	5.4e-09	0.0116678	0.016953	0.4913
rs10779751	1	11284336	A	G	0.0139	0.0018	2.5e-14	0.00349389	0.0185246	0.8504
rs761423	1	17301672	T	C	0.0113	0.0017	5.5e-11	0.00752827	0.0164047	0.6463
rs967605	1	23399932	T	C	-0.0192	0.0023	1.7e-16	0.0264467	0.0221791	0.2331
rs12027258	1	33314879	T	C	0.0159	0.0023	3e-12	0.062787	0.0216952	0.003803
rs4653017	1	33776728	T	C	0.0122	0.0018	4.5e-11	-0.05975	0.0173106	0.0005572
rs9426003	1	34602870	A	G	-0.0116	0.0019	1.4e-09	-0.0111377	0.0182242	0.5411
rs11583122	1	38053458	T	C	0.0182	0.003	7.4e-10	-0.0724137	0.0310899	0.01985
rs2282231	1	39569571	T	C	0.0165	0.0021	4.8e-15	0.0138961	0.0200424	0.4881
rs946526	1	46487168	T	C	-0.0314	0.0043	1.7e-13	0.0489802	0.0522996	0.349
rs2275426	1	46487552	A	G	0.0104	0.0016	2e-10	-0.0241071	0.0164051	0.1417
rs6700838	1	47700027	T	C	-0.017	0.0017	2.5e-22	-0.0228593	0.0165262	0.1666
rs7531656	1	49828663	A	G	0.0195	0.0017	7.4e-29	-0.00568382	0.0173769	0.7436
rs2356865	1	50836334	T	C	-0.0114	0.0019	1.6e-09	0.0156214	0.0177233	0.3781
rs2481665	1	62594677	T	C	0.0161	0.0016	7.2e-23	0.0068763	0.0163623	0.6743
rs11208660	1	65983626	T	C	0.0195	0.003	4.1e-11	-0.00390762	0.0290237	0.8929
rs7531118	1	72837239	T	C	-0.0256	0.0016	3.6e-54	-0.0132879	0.0169584	0.4333
rs12042908	1	74997762	A	G	0.0184	0.0016	1.4e-29	-0.00159872	0.0162026	0.9214
rs17391694	1	78623626	T	C	0.0317	0.0025	7.5e-38	0.0894872	0.0463864	0.05371
rs2154297	1	80791708	T	C	-0.0115	0.0019	1.2e-09	0.0132123	0.018613	0.4778
rs284227	1	82379446	T	C	-0.0147	0.0019	3.5e-15	0.0113355	0.018728	0.545
rs6690764	1	92976590	A	G	-0.0154	0.0022	6.3e-12	-0.0136933	0.0201558	0.4969
rs1973993	1	96943994	T	C	-0.0208	0.0017	4.7e-33	-0.0185714	0.0165048	0.2605
rs2030342	1	97388226	T	C	0.0143	0.0017	1.9e-16	0.0316924	0.0163204	0.05215
rs4372296	1	98320492	A	C	-0.0133	0.002	7.6e-11	0.0263498	0.0193285	0.1728
rs1730859	1	107617707	A	G	-0.0118	0.0017	1.1e-11	-0.0224462	0.0175967	0.2021
rs11185092	1	107886278	A	G	-0.0142	0.0021	1.4e-11	-0.020713	0.0207169	0.3174
rs17531363	1	107977075	A	C	0.0133	0.0019	2e-12	0.00270365	0.0178636	0.8797
rs7550711	1	110082886	T	C	0.0649	0.005	3.2e-38	-0.0489806	0.0483161	0.3107
rs12033257	1	112318484	A	G	0.0146	0.0018	2.4e-15	0.0139029	0.0181868	0.4446
rs12731372	1	118852975	T	C	0.0116	0.0019	1.2e-09	-0.005286	0.0200346	0.7919
rs10923724	1	119546842	T	C	-0.0118	0.0016	6.4e-13	-0.00925702	0.0164151	0.5728
rs6587552	1	151018861	A	G	0.0173	0.002	1.6e-17	-0.0320799	0.0194566	0.09919
rs905938	1	154991389	T	C	-0.0149	0.0019	1.2e-15	-0.00816656	0.0190899	0.6688
rs11577179	1	155983710	A	G	-0.0108	0.0017	1.5e-10	0.00299551	0.0174496	0.8637
rs10733051	1	167280354	A	G	0.0097	0.0016	2.9e-09	-0.00551518	0.0161293	0.7324
rs12564992	1	174478100	A	G	-0.0196	0.0026	5.3e-14	0.0265446	0.0254213	0.2964
rs6691857	1	174885129	T	C	-0.0347	0.0051	6.9e-12	0.111826	0.0478544	0.01945
rs543874	1	177889480	A	G	-0.0475	0.002	1.2e-122	-0.00955421	0.0203308	0.6384
rs10920678	1	190239907	A	G	0.0155	0.0016	1.5e-21	0.0178399	0.0163835	0.2762
rs12041258	1	195047936	T	C	0.0146	0.002	9.5e-13	-0.012275	0.019442	0.5278
rs10754210	1	197012111	A	G	-0.0123	0.0018	3.2e-11	0.0145047	0.0173961	0.4044
rs2820311	1	201841476	A	G	-0.0235	0.0018	4.1e-38	0.00439035	0.0174992	0.8019
rs9077	1	202116238	A	G	-0.0138	0.0019	3.5e-13	-0.0130149	0.0180021	0.4697
rs823074	1	205774839	T	C	0.0112	0.0017	1.6e-10	-0.00883895	0.0165819	0.594
rs17014375	1	209543560	T	G	-0.0172	0.0025	1.1e-11	0.0248877	0.0243882	0.3075
rs11118308	1	219633869	A	G	0.0101	0.0016	4.8e-10	0.00129916	0.0174641	0.9407
rs10915840	1	225668524	A	G	-0.0118	0.0019	1.3e-09	-0.0419094	0.0188191	0.02595
rs2491864	1	242986063	A	G	0.0137	0.0021	7.3e-11	-0.00389241	0.0197677	0.8439
rs12042959	1	243533273	A	G	0.0144	0.0024	3.4e-09	-0.00220242	0.0235533	0.9255
rs3753549	1	243722892	T	C	-0.0203	0.0025	1.7e-15	0.00846408	0.0238524	0.7227
rs6548221	2	295255	A	G	0.0151	0.002	1.7e-14	0.0205089	0.019637	0.2963
rs4639527	2	416815	A	G	-0.0172	0.0019	3.3e-20	0.00339423	0.0189033	0.8575
rs13021737	2	632348	A	G	-0.0574	0.0021	7.5e-157	-0.00786896	0.0214476	0.7137
rs10929925	2	6155557	A	C	-0.0143	0.0016	1.8e-18	-0.022544	0.0166485	0.1757
rs10182181	2	25150296	A	G	-0.0325	0.0016	6.7e-90	-0.0218367	0.016358	0.1819
rs4372836	2	28973883	T	C	0.0142	0.0018	7.3e-16	0.0250102	0.0177488	0.1588
rs17327461	2	35512183	T	C	0.0125	0.0016	1.5e-14	0.00531409	0.0161942	0.7428
rs4670626	2	37046657	T	C	-0.0113	0.0018	4.9e-10	0.00712532	0.0171614	0.678
rs17035438	2	46878616	A	G	0.0199	0.003	3.3e-11	0.030253	0.0288531	0.2944
rs7561278	2	48954905	T	C	0.0159	0.0021	5.7e-14	0.00229736	0.0217814	0.916
rs930295	2	50233352	A	C	0.0211	0.0023	1e-19	0.00905884	0.0221606	0.6827
rs13432055	2	56603985	T	C	-0.0117	0.0018	8.9e-11	0.0009995	0.0181568	0.9561
rs4671328	2	58935282	T	G	0.0219	0.0017	2.2e-36	0.00846408	0.0164053	0.6059
rs6545714	2	59307725	A	G	-0.0191	0.0017	9.1e-31	-0.0168571	0.0167007	0.3128
rs1559625	2	60173866	A	G	-0.009	0.0018	3.1e-07	0.0230639	0.0167489	0.1685
rs980329	2	60285100	T	C	-0.0133	0.002	2.5e-11	-0.0176549	0.0192713	0.3596
rs13417156	2	62848319	T	C	-0.0144	0.0017	2.6e-17	-0.0112366	0.0194473	0.5634
rs7607351	2	69562127	T	C	0.0119	0.0017	8.4e-12	-0.0374942	0.0165831	0.02376
rs934515	2	79482643	A	G	0.0185	0.0027	7.6e-12	0.00934352	0.0250002	0.7086
rs1371108	2	81816251	A	C	0.0119	0.0018	9e-11	0.00561574	0.0176023	0.7497
rs7557796	2	86766153	T	C	0.016	0.0018	2.3e-19	0.0153811	0.0171717	0.3704
rs4303732	2	100830040	T	C	0.0144	0.0017	2.2e-16	-0.0160278	0.0165048	0.3315
rs6711584	2	104421692	A	G	0.0128	0.0017	2.2e-13	-0.0009995	0.0170305	0.9532
rs1451533	2	105466005	A	G	0.0167	0.0019	1e-17	0.00249688	0.0183387	0.8917
rs902695	2	113955074	A	G	-0.0103	0.0017	2.2e-09	0.00020002	0.0199488	0.992
rs17551974	2	142293146	A	C	-0.0141	0.0022	1.9e-10	-0.00518653	0.0209752	0.8047
rs2890652	2	142959931	T	C	-0.017	0.0023	2.5e-13	0.0138961	0.0218084	0.524
rs6710871	2	143960593	A	G	0.0179	0.0024	1e-13	0.0495054	0.0232206	0.03301
rs7560871	2	145616899	A	G	0.0218	0.0034	9.6e-11	0.0230639	0.0312161	0.46
rs453520	2	147907202	T	C	-0.015	0.0017	7e-18	-0.0246001	0.0165849	0.138
rs6738445	2	172599615	T	C	-0.0133	0.0018	1.9e-13	0.0288111	0.0182748	0.1149
rs10930641	2	175000711	A	G	-0.0137	0.0017	3.6e-15	-0.0062193	0.0166408	0.7086
rs9630985	2	181607676	A	C	-0.0177	0.0018	4.4e-22	-0.0275179	0.0174834	0.1155
rs4850808	2	198576142	T	C	0.0111	0.0017	9.8e-11	0.0009995	0.0159393	0.95
rs7564679	2	204012790	A	G	-0.0116	0.0016	1.3e-12	-0.0528735	0.0165345	0.001385
rs12694021	2	206084372	A	C	0.0106	0.0017	1e-09	-0.00581689	0.0164916	0.7243
rs972540	2	207244783	A	G	-0.013	0.0018	8e-13	-0.00833464	0.0184129	0.6508
rs17203016	2	208255518	A	G	-0.015	0.002	2.1e-13	0.00389241	0.0212555	0.8547
rs4673553	2	211608379	T	G	-0.0142	0.0017	2.1e-16	0.00571631	0.0164741	0.7286
rs1437929	2	211983316	A	G	0.0135	0.0019	9.9e-13	-0.0244976	0.0179071	0.1713
rs7599312	2	213413231	A	G	-0.0186	0.0019	6.9e-24	-0.013607	0.0182778	0.4566
rs7607369	2	219279097	A	G	0.0117	0.0016	9.3e-13	0.0195906	0.0164084	0.2325
rs11889536	2	220163543	A	G	0.0189	0.0024	6.4e-15	-0.00702461	0.0234999	0.765
rs6436746	2	228893467	T	C	0.012	0.0017	2.2e-12	-0.0111377	0.0163031	0.4945
rs10211055	2	229016917	T	C	-0.0157	0.0018	7.2e-18	-0.0111621	0.0177436	0.5293
rs6720868	2	230663576	T	C	0.0155	0.0018	5.1e-17	-0.00662188	0.0173739	0.7031
rs3915844	3	9514856	A	G	0.0152	0.0025	2.2e-09	-0.0548669	0.0239663	0.02206
rs1899951	3	12394840	T	C	0.017	0.0024	3.1e-12	-0.0228372	0.0247163	0.3555
rs580438	3	13345450	T	C	0.0114	0.0018	6.5e-10	0.0102524	0.0172507	0.5523
rs11128760	3	15873407	A	G	0.011	0.0017	3.1e-10	-0.0311811	0.0166278	0.06076
rs4858193	3	20441050	T	C	0.0129	0.0019	1.6e-11	0.00359354	0.0184172	0.8453
rs6804842	3	25106437	A	G	-0.0156	0.0017	3.6e-21	-0.0177417	0.0164979	0.2822
rs9814633	3	41310470	A	G	0.0122	0.0018	2.1e-11	0.0183677	0.0171653	0.2846
rs10460960	3	42308735	A	G	0.0197	0.0025	8.1e-15	0.0068763	0.025998	0.7914
rs28350	3	42418446	A	G	0.0177	0.0022	3.5e-15	0.00531409	0.02104	0.8006
rs6442101	3	48130893	T	C	-0.0117	0.0017	2.5e-11	-0.0127813	0.017513	0.4655
rs2230590	3	49936102	T	C	-0.0239	0.0017	4.1e-44	-0.0102524	0.0163174	0.5298
rs9838283	3	50820486	A	G	0.0161	0.0026	1e-09	0.0244975	0.0250965	0.329
rs2710323	3	52815905	T	C	-0.0141	0.0016	4.8e-18	0.00598207	0.0163346	0.7142
rs2680648	3	53777176	T	C	0.016	0.002	3.8e-15	0.0103463	0.0190779	0.5876
rs12488237	3	56114861	T	C	-0.0235	0.0036	4.5e-11	-0.0010005	0.0389364	0.9795
rs2365389	3	61236462	T	C	-0.0174	0.0017	1.3e-25	0.0188218	0.0165979	0.2568
rs1452075	3	62481063	T	C	0.0141	0.0018	1.3e-14	-0.0143959	0.0182097	0.4292
rs11915371	3	70539559	A	C	-0.0149	0.0021	2.6e-12	0.0140989	0.0200803	0.4826
rs775731	3	77624784	T	C	-0.0108	0.0017	6.6e-10	-0.00707491	0.016586	0.6697
rs3849570	3	81792112	A	C	0.0132	0.0017	3.3e-14	0.0247902	0.017128	0.1478
rs10511093	3	83763541	T	C	-0.0228	0.0034	1.1e-11	-0.022055	0.0312047	0.4797
rs2122042	3	85866335	T	G	0.0235	0.002	2.3e-31	-0.0104545	0.0200073	0.6013
rs4857329	3	94036952	A	G	0.0202	0.0017	5.3e-32	0.0112632	0.0162599	0.4885
rs1436343	3	104606130	A	G	-0.0141	0.0017	7.3e-16	-0.0198026	0.0164725	0.2293
rs13321566	3	107342662	A	G	-0.0135	0.0023	4.7e-09	0.00945516	0.021975	0.667
rs7640424	3	107820063	T	C	-0.0136	0.0018	2.3e-14	-0.00944446	0.0179755	0.5993
rs4273371	3	108119071	T	C	-0.0115	0.0016	1.2e-12	0.0319035	0.016347	0.05098
rs17681451	3	114399296	A	G	-0.0197	0.0031	3.5e-10	0.00662188	0.0293502	0.8215
rs2868975	3	116935323	A	G	-0.0143	0.0023	2.2e-10	0.0123763	0.0210517	0.5566
rs4624596	3	119571541	T	C	0.0136	0.0023	2.2e-09	0.00692392	0.0212197	0.7442
rs1909586	3	124687767	T	G	-0.0106	0.0018	4.8e-09	-0.0280909	0.0173733	0.1059
rs10935143	3	134665159	A	G	-0.0109	0.0017	2.8e-10	-0.00985132	0.016555	0.5518
rs6786582	3	135898984	T	C	-0.0159	0.0018	7.5e-18	0.0112366	0.0183362	0.54
rs16851483	3	141275436	T	G	0.0369	0.0035	3.2e-26	0.0449974	0.0338852	0.1842
rs171390	3	154038412	T	C	-0.0153	0.0017	2.8e-18	0.0121738	0.0164768	0.46
rs9289970	3	156301324	A	C	0.0146	0.0024	1.5e-09	0.00129916	0.0236542	0.9562
rs1500925	3	156973804	A	G	-0.0118	0.0018	1.2e-10	-0.00511305	0.0170006	0.7636
rs827092	3	157985182	T	C	0.0129	0.0017	1.1e-13	0.00521357	0.0164641	0.7515
rs5396	3	170744815	T	C	-0.0154	0.0018	3e-17	0.00320513	0.0182514	0.8606
rs39654	3	173095123	A	G	-0.0145	0.0017	6.5e-17	-0.0185273	0.0169617	0.2747
rs6443750	3	181329682	T	C	-0.0148	0.0021	3.2e-12	0.0141001	0.0323974	0.6634
rs262956	3	183486117	T	G	0.0125	0.0018	6.1e-12	-0.00893984	0.0172365	0.604
rs2293605	3	184044433	T	C	-0.0167	0.0027	3.6e-10	0.0658193	0.0251327	0.008822
rs6764533	3	196088464	A	G	0.0116	0.0018	1.4e-10	-0.0331432	0.0174994	0.05823
rs1477887	4	18514827	A	G	-0.0138	0.0017	2e-15	0.0179603	0.0164221	0.2741
rs1323068	4	20263058	A	G	-0.0114	0.0018	6.9e-10	0.0156765	0.017619	0.3736
rs9291467	4	25428296	T	C	0.014	0.0017	6.7e-16	0.0283995	0.0164196	0.0837
rs6448587	4	28561990	A	C	0.0167	0.0023	2.3e-13	0.032564	0.0207235	0.1161
rs1345148	4	30843533	T	C	-0.0111	0.0017	2.5e-10	0.001998	0.0166006	0.9042
rs1000096	4	38692835	T	C	-0.0144	0.0018	1.8e-15	-0.041046	0.0171602	0.01676
rs1866510	4	44514468	T	C	-0.0105	0.0018	8.1e-09	0.0109598	0.0173589	0.5278
rs10938397	4	45182527	A	G	-0.0324	0.0016	3.4e-86	-0.0236781	0.0164566	0.1502
rs784944	4	52927229	A	G	0.0122	0.0019	3.9e-10	0.00833464	0.0186761	0.6554
rs1492767	4	55221467	T	C	0.0094	0.0016	1e-08	0.0199007	0.0165434	0.229
rs2192158	4	55505360	A	G	0.0129	0.0017	8.3e-14	0.0119714	0.0164179	0.4659
rs925421	4	60253877	A	G	0.0116	0.002	5.8e-09	-0.00359354	0.0191306	0.851
rs11945861	4	65700865	A	G	-0.0148	0.002	5e-13	0.00692392	0.019287	0.7196
rs7674623	4	80794681	T	C	0.0135	0.0022	5.7e-10	-0.0357532	0.0205989	0.08262
rs4148155	4	89054667	A	G	0.0188	0.0026	5e-13	-0.00420884	0.0267119	0.8748
rs12642077	4	91269591	T	C	-0.0108	0.0017	3.2e-10	0.000499875	0.0172635	0.9769
rs2850969	4	102183594	T	C	-0.0165	0.0024	1.3e-11	-0.0505981	0.0229345	0.02737
rs7377083	4	102708997	A	C	0.02	0.0018	1.4e-27	0.031983	0.0181095	0.07738
rs13107325	4	103188709	T	C	0.047	0.0032	1.1e-47	0.113505	0.0378848	0.002735
rs6843738	4	103936001	A	G	-0.0107	0.0017	7.2e-10	0.0508832	0.0173144	0.003295
rs326889	4	112713436	T	C	-0.0129	0.0018	2.4e-13	-0.0275179	0.0168085	0.1016
rs7694732	4	115124089	A	G	0.0099	0.0017	8.7e-09	0.00767051	0.0163858	0.6397
rs4864201	4	130731284	T	C	0.0141	0.0017	1.5e-16	-0.0134097	0.0172222	0.4362
rs1296328	4	137083193	A	C	0.0179	0.0018	4.9e-24	0.000299955	0.0154396	0.9845
rs769671	4	140883618	T	C	-0.0132	0.0018	7.8e-13	-0.0443039	0.0180052	0.01387
rs331949	4	143663206	T	C	-0.011	0.0017	1e-10	0.0255703	0.0168089	0.1282
rs1455137	4	145986668	A	C	-0.0106	0.0017	4.4e-10	-0.0010994	0.0164145	0.9466
rs4835038	4	147377255	A	C	0.0137	0.002	5.6e-12	-0.0010005	0.0179297	0.9555
rs6827083	4	153075491	A	G	-0.0097	0.0016	4.8e-09	0.00430927	0.0164703	0.7936
rs13110266	4	162129844	A	G	-0.0117	0.0017	1.9e-12	-0.00876151	0.0165712	0.597
rs17538472	4	163038241	T	C	0.0129	0.0022	4.2e-09	0.0321101	0.0204682	0.1167
rs1522569	4	171632637	T	G	0.0164	0.0022	2.9e-13	-0.00060018	0.0210004	0.9772
rs7683836	4	180167906	A	G	-0.0114	0.0017	6.3e-11	-0.016536	0.0164538	0.3149
rs4518345	5	27185904	A	G	-0.0117	0.0019	1e-09	0.00924258	0.0179891	0.6074
rs7730004	5	43191033	T	C	0.0148	0.0018	9.1e-16	-0.0411419	0.0174233	0.01821
rs12189178	5	50914726	T	C	0.0364	0.0046	2.2e-15	-0.0485044	0.0554599	0.3818
rs6449531	5	60712212	A	G	-0.0127	0.0018	2.1e-12	-0.0265446	0.0170499	0.1195
rs6873572	5	63932398	T	C	0.0114	0.0018	4.9e-10	0.00588266	0.0174411	0.7359
rs2367112	5	64168193	T	G	0.0119	0.0016	2.3e-13	0.0176549	0.0161496	0.2743
rs25832	5	66175682	A	G	0.0118	0.0019	9.2e-10	-0.0389488	0.0183281	0.03358
rs2307111	5	75003678	T	C	0.0265	0.0016	1.6e-58	-0.0166376	0.0167892	0.3217
rs12514473	5	80818639	T	C	0.0167	0.002	8.8e-17	-0.00270365	0.0195129	0.8898
rs7444298	5	87730027	A	G	0.0179	0.002	7.8e-19	0.00856323	0.0190405	0.6529
rs2304607	5	87988733	A	G	-0.032	0.0025	1.7e-36	-0.00757127	0.0233075	0.7453
rs1881459	5	88841488	A	G	-0.0137	0.0018	2.5e-14	0.0428679	0.016899	0.01119
rs159032	5	94206202	T	C	0.0129	0.002	1.9e-10	0.0129839	0.019277	0.5006
rs7713317	5	95716722	A	G	-0.0162	0.0018	3.9e-19	0.0168571	0.0179883	0.3487
rs2611742	5	95856501	T	C	-0.0152	0.0017	3.7e-18	-0.0186733	0.0164496	0.2563
rs3822683	5	96080883	A	G	0.0145	0.0021	6.1e-12	-0.0367677	0.0195552	0.06008
rs7710595	5	106506697	A	C	0.0101	0.0017	5e-09	0.00611868	0.0161163	0.7042
rs40067	5	107439012	A	G	-0.0266	0.0023	7.1e-30	-0.038836	0.0214628	0.07038
rs1907201	5	119378643	A	G	-0.0118	0.0017	8.3e-12	0.0116678	0.0164036	0.4769
rs7711753	5	122733317	A	G	-0.0134	0.0016	3.4e-16	0.0221528	0.0163672	0.1759
rs329124	5	133865452	A	G	0.0131	0.0017	5.3e-14	-0.0336602	0.0166409	0.0431
rs7716275	5	137631073	T	G	-0.0132	0.0021	2.2e-10	0.0295318	0.020857	0.1568
rs13174863	5	139080745	A	G	-0.0192	0.0023	2.9e-16	0.00618086	0.0244468	0.8004
rs2190788	5	144484261	T	G	0.0141	0.0019	2.9e-14	0.040822	0.0177829	0.0217
rs7715256	5	153537893	T	G	-0.0166	0.0016	2.2e-24	-0.00757127	0.0164286	0.6449
rs17056301	5	158271680	T	C	-0.0118	0.002	2.4e-09	-0.0287818	0.0186018	0.1218
rs248139	5	167352783	A	G	0.0133	0.0022	1.2e-09	-0.0120274	0.0208212	0.5635
rs7730898	5	170459675	A	G	0.0168	0.0018	4.5e-20	0.00856323	0.0183642	0.641
rs9463175	6	9510030	T	C	-0.0108	0.0017	4.2e-10	-0.0173486	0.0170815	0.3098
rs2228213	6	12124855	A	G	-0.0139	0.0017	4.6e-16	-0.0209172	0.0173101	0.2269
rs9367368	6	13189275	T	C	0.0121	0.0018	1e-11	0.0133892	0.0177439	0.4505
rs11753081	6	20705590	T	G	0.0138	0.0021	8.9e-11	-0.0113643	0.0209607	0.5877
rs7760082	6	21919387	A	G	-0.0122	0.0018	2.9e-11	0.024595	0.0175129	0.1602
rs6900723	6	23876240	T	C	-0.0112	0.0018	1.4e-09	0.0251803	0.0173804	0.1474
rs853679	6	28296863	A	C	0.0134	0.0022	2.8e-09	0.064476	0.0233622	0.005783
rs498240	6	31892592	A	G	-0.0267	0.0033	1.6e-15	-0.173701	0.0371107	2.86e-06
rs419261	6	33554147	T	C	0.0106	0.0017	1.9e-10	0.0758017	0.0168843	7.14e-06
rs2814992	6	34617144	A	G	-0.0245	0.0017	4.1e-45	-0.00410843	0.017501	0.8144
rs9380529	6	35675696	A	G	-0.0105	0.0017	1.1e-09	-0.0009995	0.016958	0.953
rs17757975	6	38214150	T	C	0.0143	0.0024	4.2e-09	-0.00863719	0.0234986	0.7132
rs847747	6	40080069	T	G	-0.0113	0.0019	2.1e-09	0.0251803	0.0177237	0.1554
rs7748777	6	41133806	A	G	0.0105	0.0016	1.6e-10	0.0429637	0.0164078	0.008832
rs9349239	6	42676480	A	G	0.0122	0.0017	1.3e-12	0.00631993	0.016231	0.697
rs998584	6	43757896	A	C	-0.0131	0.0017	1.3e-14	-0.0210194	0.0177865	0.2373
rs987237	6	50803050	A	G	-0.0409	0.0021	9.3e-84	0.0106432	0.0211975	0.6156
rs1178060	6	50914343	A	G	0.0193	0.0023	6.8e-17	0.0196065	0.0232074	0.3982
rs2246447	6	51160125	A	G	-0.0111	0.0017	1.4e-10	0.0155198	0.016299	0.341
rs6907923	6	51802669	A	G	0.0144	0.0018	4.3e-15	0.0169427	0.017264	0.3264
rs9475173	6	55013291	A	G	0.0108	0.0019	6.6e-09	-0.00994933	0.0179412	0.5792
rs1020548	6	56810539	A	G	-0.0132	0.0023	6.6e-09	0.0240095	0.0213691	0.2612
rs6921533	6	73742334	T	C	0.0118	0.0019	5.6e-10	-0.015578	0.0182141	0.3924
rs9688431	6	73922654	T	C	0.0231	0.0035	2.4e-11	0.0175452	0.0361361	0.6273
rs9294260	6	83433228	A	G	0.0147	0.0016	1.8e-19	0.0325232	0.0164263	0.04771
rs1853639	6	87606842	A	G	-0.0111	0.0018	1.2e-09	0.0111621	0.0204889	0.5859
rs9362662	6	90296588	A	G	0.0112	0.0017	1.2e-10	-0.018979	0.0163214	0.2449
rs6909685	6	97753952	T	C	-0.015	0.0019	1.2e-15	-0.0314907	0.0176314	0.07409
rs901630	6	98539519	T	C	-0.0146	0.0017	1.9e-18	-0.0304592	0.0173482	0.07913
rs155510	6	104805862	T	G	0.0165	0.0021	1.7e-14	0.00757127	0.0205014	0.7119
rs3800229	6	108996963	T	G	0.0175	0.0018	1.4e-22	-0.0113355	0.0177684	0.5235
rs2357760	6	120213880	A	G	0.0145	0.0017	6.8e-17	0.0309171	0.0173049	0.074
rs4897155	6	126095144	A	C	0.0113	0.0017	5e-11	-0.0184695	0.0163558	0.2588
rs6569648	6	130349119	T	C	-0.0126	0.0019	3.7e-11	0.0583632	0.0193669	0.002582
rs2781668	6	131897278	T	C	0.0169	0.0023	4e-13	0.0355236	0.0225573	0.1153
rs13201877	6	137675541	A	G	-0.0152	0.0024	2.7e-10	-0.00310481	0.0240783	0.8974
rs2185027	6	153381622	A	C	-0.0135	0.0018	5e-14	0.00803217	0.017772	0.6513
rs10499276	6	154309808	T	C	0.0172	0.0025	2.2e-12	-0.0105442	0.0242118	0.6632
rs487060	6	160774459	T	C	0.011	0.0016	1.6e-11	0.00190181	0.0161399	0.9062
rs13191362	6	163033350	A	G	0.0236	0.0025	5.9e-21	0.0235212	0.0254936	0.3562
rs6461115	7	2103668	A	G	0.0144	0.0019	1.2e-13	0.000699755	0.0196551	0.9716
rs4722398	7	3125220	T	C	0.0158	0.0025	3.6e-10	-0.0115332	0.024491	0.6377
rs6463489	7	5542513	T	C	0.0157	0.0026	3.1e-09	-0.00647897	0.026847	0.8093
rs7784465	7	6418275	T	C	-0.0164	0.0025	1.1e-10	-0.0318003	0.0237836	0.1812
rs6968554	7	17287106	A	G	-0.01	0.0017	3.5e-09	-0.0281937	0.0172967	0.1031
rs2282888	7	21476132	A	G	-0.0103	0.0018	9e-09	-0.0190809	0.0168441	0.2573
rs4307239	7	24354300	A	G	-0.0115	0.0017	3.9e-11	0.00853633	0.0168296	0.612
rs11971041	7	26698848	A	G	-0.021	0.0031	1e-11	-0.0171462	0.0290693	0.5553
rs4722672	7	27231762	T	C	-0.0151	0.0021	1.8e-12	-0.00883895	0.0214013	0.6796
rs849135	7	28196413	A	G	0.0109	0.0016	2e-11	-0.0425944	0.0162706	0.008848
rs215632	7	32368524	A	G	0.0152	0.0018	3.7e-17	0.010841	0.0169321	0.522
rs1229057	7	39054538	T	C	0.017	0.0027	2.8e-10	-0.0123237	0.0254263	0.6279
rs799449	7	44784697	T	C	0.013	0.0017	8.7e-14	-0.00846408	0.0167342	0.613
rs10269783	7	49616203	A	G	0.0133	0.0017	1.4e-15	-0.0030952	0.0166586	0.8526
rs3807566	7	50564204	T	G	-0.0127	0.0017	2e-13	0.00924258	0.0163045	0.5708
rs1035010	7	69598328	T	C	0.0139	0.002	6.2e-12	0.00813298	0.0185985	0.6619
rs4718966	7	70040558	T	C	0.0127	0.0018	4.6e-13	0.0294617	0.016488	0.07396
rs13227433	7	74094721	T	G	-0.0156	0.002	1.4e-14	-0.0100503	0.0194044	0.6045
rs17207196	7	75101065	T	C	-0.0221	0.0018	2.1e-35	0.0220411	0.0172256	0.2007
rs740157	7	77055885	A	G	0.0116	0.0016	1.8e-12	-0.0172479	0.0163716	0.2921
rs1544459	7	77417584	T	C	-0.0103	0.0016	2.2e-10	-0.0165621	0.0162364	0.3077
rs1852006	7	77829768	A	G	-0.0156	0.0018	4.9e-18	0.0082338	0.0174379	0.6368
rs7805441	7	78121458	T	C	0.0109	0.0017	3.4e-10	-0.00498754	0.0161189	0.757
rs13247665	7	93232057	T	C	-0.0139	0.0018	1.4e-14	-0.0101514	0.0184463	0.5821
rs13240600	7	99064466	A	G	0.0204	0.0024	3.5e-17	-0.0367176	0.0223424	0.1003
rs11496125	7	103417557	T	C	0.0169	0.0017	3e-22	-0.00531409	0.0165882	0.7487
rs10953620	7	109173373	A	C	-0.0101	0.0017	5.4e-09	0.015578	0.0163263	0.34
rs13227658	7	113353254	T	C	-0.0157	0.0017	1.7e-19	-0.0107577	0.016433	0.5127
rs12705986	7	114349099	A	G	-0.0133	0.0018	3.3e-14	0.0111621	0.0165953	0.5012
rs1899689	7	121964349	T	C	0.0117	0.0016	1.5e-12	0.0037928	0.0163903	0.817
rs2283093	7	126721231	T	C	0.0127	0.0021	3.1e-09	-0.0041912	0.0199134	0.8333
rs972283	7	130466854	A	G	0.0096	0.0016	5.1e-09	0.0358497	0.0165948	0.03075
rs3800649	7	137424509	A	G	0.0122	0.0019	3.2e-10	0.0153167	0.0182377	0.401
rs7811342	7	138794618	T	C	0.0197	0.0029	1.1e-11	-0.0291199	0.0266481	0.2745
rs11773362	7	147668180	T	C	-0.0111	0.0018	1.5e-09	0.00843548	0.0173334	0.6265
rs4725984	7	150668514	T	C	-0.0128	0.0017	1.4e-13	-0.00806737	0.0177625	0.6497
rs1658820	8	4288577	T	G	0.0141	0.0021	5.9e-12	0.0342082	0.0191939	0.07471
rs11783247	8	10788875	T	C	-0.0169	0.0016	1.2e-24	-0.00458945	0.0171332	0.7888
rs13263601	8	14095900	A	C	-0.0154	0.0018	2.2e-17	-0.016841	0.0172101	0.3278
rs10110727	8	14324437	A	G	0.0135	0.002	3.2e-11	0.0115666	0.0178845	0.5178
rs4366093	8	20639811	T	C	-0.0121	0.0018	6.7e-11	-0.00330546	0.0173379	0.8488
rs11781222	8	23389571	T	C	0.0158	0.0024	5.3e-11	0.0200967	0.0252563	0.4262
rs17446091	8	27167942	T	C	-0.0123	0.002	1.8e-09	0.0163654	0.02009	0.4153
rs1982441	8	28021769	T	G	0.0175	0.0026	7e-12	-0.0141001	0.0235234	0.5489
rs2100814	8	28118130	A	G	0.0113	0.0017	1.2e-10	-0.0223484	0.0164697	0.1748
rs1362910	8	30856464	A	G	0.0121	0.0017	1.2e-12	0.00080032	0.0169768	0.9624
rs7844647	8	34503776	T	C	0.0123	0.0018	2.8e-11	0.0132123	0.0182751	0.4697
rs4737183	8	64720693	A	G	0.0112	0.0017	1.1e-10	-0.00762903	0.016307	0.6399
rs16932761	8	67202787	A	G	-0.014	0.002	1.7e-12	9.9995e-05	0.0173444	0.9954
rs1431659	8	73439070	A	G	0.0196	0.0019	6e-24	-0.0018982	0.0177844	0.915
rs2170382	8	74689288	T	C	0.0172	0.0027	2.4e-10	0.000500125	0.0271442	0.9853
rs1405348	8	77228222	A	G	-0.0204	0.0017	6.2e-32	0.0130852	0.0164305	0.4258
rs16907751	8	81375457	T	C	-0.0209	0.003	1.6e-12	0.0010005	0.026253	0.9696
rs733594	8	85077686	T	C	0.0138	0.0018	5.9e-14	0.0104453	0.0183403	0.569
rs2634046	8	85696215	A	G	-0.0143	0.002	2.2e-12	-0.0278097	0.0188725	0.1406
rs7006629	8	87519542	T	C	0.0109	0.0017	2.5e-10	-0.0121262	0.0162129	0.4545
rs1700137	8	89461609	T	C	-0.0121	0.0019	2.5e-10	0.00707491	0.0176719	0.6889
rs12680842	8	95582606	A	G	0.0133	0.0018	4.4e-14	0.000500125	0.0162187	0.9754
rs983583	8	101961910	T	C	-0.0122	0.0018	4.8e-12	0.00833464	0.0167037	0.6178
rs3808434	8	116559435	A	G	0.011	0.0016	1.3e-11	0.0144944	0.0163349	0.3749
rs2721965	8	116662038	A	C	0.0171	0.0018	1.1e-20	0.00876151	0.0174548	0.6157
rs11781699	8	118863061	T	C	-0.0132	0.0021	3.1e-10	0.00995033	0.0214933	0.6434
rs7002038	8	132885802	A	G	0.0158	0.0027	5.4e-09	0.000900405	0.026603	0.973
rs16906845	8	138215228	A	G	-0.0225	0.0038	2.2e-09	-0.0205866	0.0339785	0.5446
rs7357604	8	142629949	A	G	-0.0105	0.0018	2.1e-09	0.0129839	0.0168364	0.4406
rs7042372	9	6959840	A	G	0.0122	0.0018	3.8e-11	0.0125213	0.01708	0.4635
rs1865341	9	8845911	T	C	0.0128	0.002	2.5e-10	-0.0238142	0.0190722	0.2118
rs17820822	9	11831420	T	G	0.0143	0.0018	2.9e-15	0.00873807	0.0170308	0.6079
rs11790280	9	14651283	T	C	-0.0103	0.0018	7.1e-09	-0.0240095	0.0168014	0.153
rs6474945	9	15670492	T	G	-0.0186	0.0016	4.7e-30	-0.0231304	0.0163518	0.1572
rs10962549	9	16719445	T	C	0.0198	0.0023	2.5e-17	0.0321101	0.0216645	0.1383
rs7874154	9	27777012	T	C	-0.0127	0.0017	1.8e-13	-0.000700245	0.0174552	0.968
rs1412234	9	28410683	T	C	-0.0243	0.0019	2.4e-39	-0.0180621	0.0175975	0.3047
rs10971712	9	33820938	T	C	-0.0197	0.0027	6.4e-13	-0.0281987	0.0261946	0.2817
rs13290794	9	37183628	A	G	-0.0141	0.0018	1.9e-15	0.0210194	0.016775	0.2102
rs1928538	9	73791317	T	C	-0.012	0.0017	7.1e-12	-0.0186733	0.0164358	0.2559
rs10867256	9	81367391	T	C	-0.0118	0.0017	8.7e-12	-0.00954541	0.0162488	0.5569
rs3739733	9	88897891	A	G	0.0132	0.0021	5.3e-10	0.0179381	0.0196294	0.3608
rs10797115	9	92191256	T	C	0.0124	0.0017	9.9e-13	0.0666301	0.0164694	5.217e-05
rs7869771	9	94180627	A	C	0.014	0.0019	4.9e-13	0.0132123	0.0184617	0.4742
rs4744275	9	96482633	A	G	0.0144	0.0018	7e-15	0.0114655	0.0185128	0.5357
rs450231	9	101481205	A	G	-0.0127	0.002	2.1e-10	-0.0164343	0.0187673	0.3812
rs10118701	9	103061366	A	G	-0.0163	0.0018	1.1e-18	-0.0226547	0.0172197	0.1883
rs10989568	9	104396304	A	G	0.0107	0.0017	6.6e-10	0.0129839	0.0163174	0.4262
rs7024334	9	109072075	T	G	0.0138	0.002	3.1e-12	0.0207825	0.0193577	0.283
rs6477694	9	111932342	T	C	-0.0123	0.0017	3.8e-13	-0.0308717	0.0169478	0.06852
rs1928295	9	120378483	T	C	0.0141	0.0016	5.4e-18	0.0167588	0.0163445	0.3052
rs7865157	9	122631560	T	C	0.0177	0.0028	3.7e-10	-0.00020002	0.0354649	0.9955
rs10818810	9	126096522	A	G	0.0126	0.0017	1.1e-13	-0.027907	0.0170212	0.1011
rs10818938	9	127049237	A	G	0.0114	0.0017	5.1e-11	-0.0114344	0.0164919	0.4881
rs3829849	9	129390800	T	C	0.0098	0.0017	5.9e-09	0.00080032	0.0177318	0.964
rs3902840	9	129419025	A	G	0.0222	0.003	3.2e-13	-0.00707491	0.0289908	0.8072
rs13292976	9	129467340	T	C	0.0131	0.0017	3.1e-14	-0.00618086	0.0162283	0.7033
rs4734	9	131018639	T	G	-0.0184	0.0025	6e-14	-0.0184695	0.0240179	0.4419
rs4740383	9	133783566	A	G	0.0126	0.0018	1.9e-12	-0.00080032	0.0163669	0.961
rs11792069	9	140646121	A	G	0.0145	0.0024	6.5e-10	0.00448991	0.0241982	0.8528
rs11251352	10	2585792	A	G	-0.0109	0.0018	7e-10	0.00974735	0.0166941	0.5593
rs7893571	10	16750129	T	G	0.0136	0.0018	1.8e-13	0.0293258	0.0173376	0.09075
rs12768319	10	19812754	T	C	-0.0123	0.0019	1.6e-10	0.011769	0.0187494	0.5302
rs7084454	10	21821274	A	G	0.0193	0.0019	4e-25	0.0341775	0.017531	0.05123
rs3781099	10	27318776	T	C	0.021	0.0031	2.5e-11	0.0036065	0.0293491	0.9022
rs3851083	10	33862727	A	G	-0.0102	0.0016	4.1e-10	0.0125213	0.0165534	0.4494
rs10762499	10	53680563	T	C	0.0108	0.0018	4.1e-09	-0.00329457	0.0171658	0.8478
rs7919685	10	65315800	T	G	0.0129	0.0017	5.2e-14	0.00702461	0.0161709	0.664
rs12098284	10	76047464	T	C	0.0178	0.0026	1.8e-11	0.00468899	0.0253408	0.8532
rs7899106	10	87410904	A	G	-0.0331	0.0037	1e-18	-0.0720332	0.0378722	0.05717
rs10749537	10	88111203	T	C	0.0124	0.0017	7.2e-13	0.0334534	0.0163987	0.04135
rs2631681	10	93032943	T	C	-0.0113	0.0017	8.9e-11	0.0132879	0.0173785	0.4445
rs577525	10	99769388	T	C	-0.0166	0.0017	9.7e-22	-0.031111	0.0164805	0.05906
rs17094222	10	102395440	T	C	-0.0181	0.002	2.2e-19	0.00468899	0.0207949	0.8216
rs10883553	10	102635475	A	C	0.0119	0.0018	1.9e-11	-0.0212236	0.0174881	0.2249
rs9787495	10	103206115	A	G	-0.0103	0.0017	3.1e-09	0.00866237	0.0163436	0.5961
rs7083450	10	103984060	T	C	0.0159	0.0023	1.7e-12	-0.0315939	0.0222811	0.1562
rs10883759	10	104412049	A	G	-0.0122	0.0018	5.4e-12	0.0155198	0.0179292	0.3867
rs12411886	10	104685299	A	C	0.0271	0.003	1.5e-19	-0.0415257	0.0287618	0.1488
rs7903146	10	114758349	T	C	-0.0181	0.0018	1.3e-23	0.0328332	0.0180455	0.06884
rs10886017	10	118672531	A	C	0.0152	0.0019	1.4e-15	-0.00697561	0.0188816	0.7118
rs845084	10	125220036	A	G	0.014	0.002	1.3e-12	0.0195085	0.0183187	0.2869
rs17636031	10	126594078	T	C	-0.016	0.0019	1.2e-17	-0.0207825	0.0220351	0.3456
rs10840606	11	2234690	A	G	-0.0164	0.0024	3.2e-12	0.005286	0.0217179	0.8077
rs7113874	11	8688016	T	C	-0.018	0.0017	8.3e-26	0.0226547	0.017029	0.1834
rs1037587	11	11796727	T	C	0.0106	0.0017	1.1e-09	-0.0232686	0.0164495	0.1572
rs900144	11	13294268	T	C	0.0166	0.0017	8.7e-22	-0.00591747	0.0165451	0.7206
rs2051772	11	17389850	A	G	0.0124	0.0017	2.5e-13	0.0240095	0.0168014	0.153
rs6265	11	27679916	T	C	-0.0412	0.0021	1e-86	-0.00722605	0.0206114	0.7259
rs7948120	11	28763321	T	C	-0.0132	0.0019	7.3e-12	0.0210194	0.0201466	0.2968
rs7941881	11	29189352	T	C	0.0145	0.0025	1.1e-08	-0.0115332	0.0235961	0.625
rs1782507	11	30243868	T	G	-0.0135	0.0018	1.3e-13	-0.0361454	0.0169628	0.0331
rs223051	11	32131303	T	C	0.0112	0.0018	1.1e-09	-0.00964638	0.0172854	0.5768
rs10838122	11	43551416	T	C	-0.0105	0.0017	1.5e-09	0.0163654	0.0164396	0.3195
rs7928523	11	43719101	T	C	0.0213	0.0018	8.1e-31	0.0205089	0.0173841	0.2381
rs12574668	11	46422686	A	C	0.0132	0.0023	8.8e-09	-0.0123763	0.021895	0.5719
rs7124681	11	47529947	A	C	0.0263	0.0016	3.2e-58	-0.020611	0.0166734	0.2164
rs11600990	11	64082807	T	C	-0.0178	0.0023	3.8e-14	0.00150113	0.0224126	0.9466
rs7102454	11	65594820	T	C	-0.0158	0.0018	2.4e-18	0.0404054	0.0175299	0.02117
rs587230	11	69299771	A	G	0.0149	0.0023	4.7e-11	0.00229736	0.0224796	0.9186
rs1789165	11	69481969	A	G	0.0138	0.0017	8e-16	0.0201947	0.0171762	0.2397
rs7123876	11	72444583	T	C	-0.0119	0.0019	2.2e-10	-0.0657125	0.0187338	0.000452
rs7117238	11	78040259	A	G	-0.0131	0.0022	2.5e-09	0.039413	0.0215222	0.06706
rs10830452	11	89966202	A	G	-0.0111	0.0018	2.1e-09	0.0356567	0.0175396	0.04206
rs2605603	11	93221105	A	G	-0.0103	0.0016	2.5e-10	-0.0246001	0.016116	0.1269
rs719802	11	113234679	T	C	0.0101	0.0018	9.5e-09	0.0209172	0.016888	0.2155
rs1048932	11	115044850	A	C	-0.016	0.0017	3.8e-22	-0.0733237	0.0166641	1.082e-05
rs12420725	11	117017530	A	G	-0.0226	0.0037	1.3e-09	0.0794579	0.0363518	0.02883
rs1003081	11	118913993	T	C	0.0121	0.0016	1.3e-13	-0.0171462	0.0163799	0.2952
rs583564	11	121942599	A	G	0.0099	0.0018	3.9e-08	0.00440971	0.0169381	0.7946
rs7941030	11	122522375	T	C	-0.0112	0.0017	2e-11	-0.0694573	0.016624	2.939e-05
rs3134438	11	122765667	A	C	0.0113	0.0019	6.1e-09	-0.0172504	0.0183736	0.3478
rs1625427	11	131957293	T	C	0.013	0.0018	1.4e-12	0.0127188	0.0172682	0.4614
rs4936175	11	132641959	T	C	-0.0122	0.0017	1.4e-12	0.00409162	0.0162917	0.8017
rs329651	11	133767622	T	G	0.0164	0.0021	9e-15	0.00608147	0.0219878	0.7821
rs12364470	11	134601012	T	G	-0.0178	0.0022	1.1e-15	0.0243023	0.0230198	0.2911
rs11611246	12	939480	T	G	0.024	0.002	5e-32	-0.000899595	0.0214198	0.9665
rs2429150	12	2152655	A	C	-0.0111	0.0018	2.7e-10	0.0316924	0.0166129	0.05643
rs10744146	12	17212881	A	G	-0.0122	0.0017	1.4e-12	-0.0226417	0.0162146	0.1626
rs621042	12	18789007	A	C	-0.0107	0.0017	6.3e-10	0.00558438	0.0163127	0.7321
rs949473	12	33407093	A	G	0.0174	0.0026	4.2e-11	-0.0191161	0.0240084	0.4259
rs10876418	12	39428802	T	C	-0.0123	0.0019	2.8e-10	-0.0310141	0.0198182	0.1176
rs2733287	12	41880909	A	C	-0.0157	0.0017	6.8e-20	-0.0139975	0.0163006	0.3905
rs7138803	12	50247468	A	G	0.03	0.0017	2.3e-71	0.0405095	0.0168672	0.01632
rs4077093	12	51593616	T	G	0.0128	0.0022	5.1e-09	0.0478256	0.0203628	0.01884
rs4759073	12	54653258	A	G	-0.0116	0.0017	2.8e-11	0.00210221	0.0168137	0.9005
rs7975187	12	60964108	A	G	-0.0128	0.0021	1.4e-09	-0.0175452	0.0202051	0.3852
rs1819844	12	68205604	A	G	0.0143	0.0021	2.6e-11	0.0277824	0.0211507	0.189
rs10878946	12	69642315	T	C	-0.0141	0.0019	3.6e-13	-0.0136933	0.0179481	0.4455
rs11115176	12	82465797	T	C	0.0121	0.0019	2e-10	-0.00160128	0.0193655	0.9341
rs2731222	12	90595383	A	C	0.0131	0.0019	1.5e-11	0.0241902	0.0181791	0.1833
rs10745785	12	97586257	T	C	-0.0111	0.0018	1.2e-09	-0.00299551	0.0170949	0.8609
rs651548	12	99560183	A	G	0.0139	0.0018	2e-14	-0.0292675	0.0168034	0.08155
rs4764949	12	103658096	A	G	0.0184	0.0018	1.7e-23	0.00895974	0.017424	0.6071
rs11611496	12	108413828	A	G	-0.0169	0.002	1.7e-16	0.0103534	0.0194864	0.5952
rs17608150	12	110046698	T	C	0.0196	0.0031	1.3e-10	0.0497156	0.030897	0.1076
rs11066301	12	112871372	A	G	0.0114	0.0016	4.4e-12	-0.0568528	0.0172553	0.0009849
rs4766710	12	114437708	A	G	0.0229	0.0035	3.7e-11	0.0305292	0.0337434	0.3656
rs7973955	12	118409640	A	G	-0.0126	0.0019	3.7e-11	0.00652122	0.018071	0.7182
rs3887080	12	121661966	A	G	0.0181	0.0026	5.1e-12	-0.0332413	0.0251865	0.1869
rs7133378	12	124409502	A	G	0.0125	0.0018	9.4e-13	0.0195906	0.0185146	0.29
rs10773049	12	124506631	T	C	-0.0116	0.0017	4.1e-12	0.00853633	0.016633	0.6078
rs7968230	12	133481917	A	G	0.0131	0.0018	1.6e-12	0.0179603	0.0179229	0.3163
rs1218822	13	28011963	A	G	0.0168	0.0017	1.9e-22	0.029753	0.017344	0.08626
rs1006353	13	28047269	A	G	0.0126	0.0019	2.3e-11	0.0222456	0.0185524	0.2305
rs9507983	13	28620036	T	C	-0.0156	0.0018	1.4e-18	-0.0192848	0.0165774	0.2447
rs1045411	13	31033232	T	C	-0.0148	0.0019	2.3e-15	-0.00259663	0.0200586	0.897
rs9595908	13	33184288	T	C	0.0159	0.0017	4.2e-21	0.0170538	0.0167668	0.3091
rs9603697	13	40783323	T	C	0.0141	0.0018	2.6e-14	0.0523465	0.0171625	0.002288
rs12429545	13	54102206	A	G	0.0316	0.0025	9.6e-38	0.00863719	0.0247305	0.7269
rs9527706	13	58402479	A	G	-0.0115	0.0018	5.1e-10	0.0157749	0.0183937	0.3911
rs9538141	13	59178258	A	G	0.0164	0.0017	3.5e-21	0.00631993	0.0164826	0.7014
rs7328849	13	59426899	A	G	-0.0169	0.0021	3.2e-16	0.0203907	0.0192627	0.2898
rs892261	13	65884191	T	C	-0.0103	0.0017	2.2e-09	-0.0123237	0.0163608	0.4513
rs9540493	13	66205704	A	G	0.0139	0.0017	8.1e-17	-0.00866237	0.0194709	0.6564
rs9571687	13	67472713	A	C	-0.0129	0.0018	2.8e-12	-0.00080032	0.0176827	0.9639
rs629443	13	76386075	T	G	0.0116	0.0019	1.4e-09	0.00160128	0.0189335	0.9326
rs1668633	13	78371890	T	C	0.01	0.0017	8.7e-09	0.0118702	0.0163303	0.4673
rs9530843	13	79563749	A	C	0.0128	0.0018	4.8e-13	-0.00260339	0.017158	0.8794
rs1927790	13	96922191	T	C	-0.0148	0.0016	1.8e-19	0.00250313	0.016293	0.8779
rs7334078	13	99120484	T	C	0.0121	0.0019	2.2e-10	-0.00786896	0.0184238	0.6693
rs2479958	13	111984244	A	G	0.0154	0.0018	1.5e-17	-0.00964638	0.0181556	0.5952
rs10132280	14	25928179	A	C	-0.0223	0.0018	5.6e-35	-0.0127188	0.0178042	0.475
rs12885454	14	29736838	A	C	-0.0185	0.0017	2.4e-27	-0.0185273	0.0172392	0.2825
rs8003383	14	30489090	A	C	-0.0347	0.0043	9.1e-16	-0.111714	0.0417686	0.007482
rs17522122	14	33302882	T	G	0.0159	0.0017	1.5e-21	0.00975229	0.0169609	0.5653
rs11847892	14	35657716	T	G	0.0159	0.0026	1.4e-09	0.00732678	0.0246403	0.7662
rs1956151	14	40101060	A	G	-0.013	0.0022	7.3e-09	-0.00727348	0.0204357	0.7219
rs12587412	14	47272423	T	G	0.0146	0.0017	4.8e-17	0.00934352	0.0168888	0.5801
rs217671	14	62360464	A	G	-0.0144	0.0019	1.3e-13	-0.00390762	0.0184985	0.8327
rs3902951	14	69789755	T	G	-0.0134	0.002	7e-12	-0.0137947	0.0193849	0.4767
rs17105272	14	77529783	T	C	0.011	0.0019	3.2e-09	0.0372866	0.0176139	0.03427
rs10146527	14	79499850	T	C	0.0137	0.0017	2.3e-15	-0.00390762	0.0170668	0.8189
rs7144011	14	79940383	T	G	0.0282	0.002	5.2e-47	0.0272684	0.0198069	0.1686
rs12888545	14	88308044	A	G	-0.0136	0.002	9.1e-12	-0.0560414	0.0190702	0.003296
rs1951455	14	91512339	T	C	-0.0145	0.0019	4.5e-14	-0.0473606	0.018677	0.01122
rs3850422	14	99671788	A	G	-0.0114	0.0016	3.7e-12	-0.00468899	0.016337	0.7741
rs12147845	14	101144596	T	C	0.0199	0.0027	4.5e-13	0.0010005	0.028302	0.9718
rs8016771	14	102649451	T	G	-0.019	0.0031	1.1e-09	-0.000500125	0.0273301	0.9854
rs3803286	14	103246470	A	G	0.0181	0.0018	4.1e-23	0.0950802	0.0171456	2.932e-08
rs2010281	14	103862322	A	G	-0.0161	0.0017	6.7e-21	0.0837077	0.0169665	8.068e-07
rs4906908	15	27040082	T	G	-0.0103	0.0017	2.5e-09	-0.0068763	0.016405	0.6751
rs4284600	15	31843528	T	C	-0.0118	0.0017	1.3e-11	0.0103534	0.0164103	0.5281
rs1036947	15	35827783	T	C	0.0134	0.0024	3.7e-08	0.0489806	0.0236215	0.03812
rs8036040	15	36402716	A	C	0.0109	0.0017	2.7e-10	0.0295318	0.0162181	0.06862
rs12439798	15	46584787	T	G	0.0125	0.0017	6.9e-13	0.0154796	0.0164193	0.3458
rs3736485	15	51748610	A	G	0.0134	0.0016	2.5e-16	-0.026036	0.0163367	0.111
rs340025	15	60908307	T	C	-0.0124	0.0017	1e-13	0.00059982	0.0152864	0.9687
rs8033510	15	61445514	T	C	0.0106	0.0018	5.1e-09	0.00608147	0.0169151	0.7192
rs12595158	15	62316035	T	C	-0.0394	0.0054	1.9e-13	-0.00119928	0.0525717	0.9818
rs11635675	15	63793238	T	G	0.0124	0.0018	1.3e-11	0.031983	0.0171043	0.0615
rs17200970	15	66731045	A	C	0.0145	0.002	1.3e-12	0.0158733	0.0193861	0.4129
rs13329567	15	68104367	T	C	-0.0293	0.002	1e-50	0.0253753	0.0197213	0.1982
rs7164727	15	73093991	T	C	0.0182	0.0017	3.3e-25	-0.0224501	0.017374	0.1963
rs11855853	15	78012618	T	C	-0.0145	0.002	2.4e-13	-0.0312079	0.0193177	0.1062
rs12595749	15	79432359	A	G	0.0141	0.0017	5.7e-16	0.00159872	0.0163487	0.9221
rs12593036	15	81058652	A	G	0.0154	0.0019	3.8e-16	0.0192848	0.0177769	0.278
rs12101386	15	92571283	T	G	-0.0126	0.0021	2e-09	-0.00628024	0.0200494	0.7541
rs7181498	15	95271404	T	C	0.0163	0.0018	1e-19	-0.00895974	0.0169461	0.597
rs11866815	16	387867	T	C	-0.0156	0.0019	1e-16	-0.013311	0.0190538	0.4848
rs2516739	16	2097158	A	G	-0.0159	0.0021	1.4e-14	-0.0453557	0.0233535	0.05212
rs12448257	16	3599655	A	G	0.0184	0.002	8.1e-20	-0.00846408	0.0214543	0.6932
rs879620	16	4015729	T	C	0.0231	0.0018	5.3e-38	0.00558438	0.01697	0.7421
rs10083803	16	6701400	T	C	-0.0127	0.0019	5.9e-11	0.0106566	0.018663	0.568
rs977540	16	9724750	A	G	0.014	0.0019	2.5e-13	0.0115666	0.0191718	0.5463
rs4985155	16	15129459	A	G	0.012	0.0017	3e-12	0.0389488	0.0173698	0.02494
rs12446632	16	19935389	A	G	-0.0352	0.0024	2.9e-50	-0.0314987	0.0235526	0.1811
rs889201	16	20054371	A	G	-0.0188	0.0021	6.6e-20	0.0108587	0.0211523	0.6077
rs11074446	16	20255123	T	C	0.0225	0.0024	1.8e-20	0.0254204	0.0239147	0.2878
rs9931967	16	20375351	T	G	0.0163	0.0017	1e-20	-0.00833464	0.0163172	0.6095
rs9927848	16	23833071	A	C	-0.0122	0.002	6.4e-10	0.0265446	0.0185166	0.1517
rs7195386	16	24578458	T	C	0.0133	0.0017	1.1e-14	-0.0112366	0.0162889	0.4903
rs1862451	16	24803620	A	G	0.0137	0.0019	1.9e-12	0.0254728	0.0183462	0.165
rs7187776	16	28857645	A	G	-0.0265	0.0016	1.4e-58	-0.0146062	0.0168524	0.3861
rs3814883	16	29994922	T	C	0.0232	0.0017	1.1e-40	0.0683859	0.0168257	4.816e-05
rs1549293	16	31141993	T	C	-0.0204	0.0017	7.6e-33	0.0473606	0.0167804	0.004767
rs2080454	16	49062590	A	C	-0.0129	0.0017	1.7e-14	0.0160278	0.0172102	0.3517
rs8047395	16	53798523	A	G	0.0642	0.0017	1e-200	0.0275768	0.016353	0.09173
rs11076022	16	54150978	A	G	0.0105	0.0017	2.7e-10	-0.0201947	0.0165507	0.2224
rs12448738	16	56489343	A	C	-0.0168	0.0025	2.8e-11	-0.00110061	0.0248688	0.9647
rs11075489	16	62803841	T	C	-0.0111	0.0017	1.3e-10	-0.0274206	0.0163907	0.09434
rs2307022	16	68381978	A	G	0.0135	0.0017	5.5e-15	-0.0452066	0.0172255	0.00868
rs889398	16	69556715	T	C	-0.0196	0.0016	1.3e-32	-0.00518653	0.0165439	0.7539
rs7919	16	70514828	A	C	-0.0158	0.0017	1e-19	-0.00581689	0.0166553	0.7269
rs11642001	16	71899586	A	G	-0.0137	0.0021	5.1e-11	-0.026155	0.0258321	0.3113
rs756717	16	72996162	A	G	-0.0148	0.0017	5.4e-18	-0.0218367	0.0174006	0.2095
rs6564360	16	76779612	A	G	-0.0135	0.0022	1.2e-09	-0.0397809	0.020762	0.05536
rs1541928	16	82656804	T	G	-0.0102	0.0017	3.8e-09	0.0191161	0.0163385	0.242
rs4516268	17	1846831	A	C	-0.0217	0.0021	5.2e-25	0.034074	0.0217617	0.1174
rs7217226	17	2136065	T	G	-0.013	0.0017	2.6e-14	-0.028914	0.0170449	0.08982
rs1000940	17	5283252	A	G	-0.0154	0.0018	1.1e-17	0.00458945	0.0175412	0.7936
rs17681708	17	9792872	T	C	-0.0106	0.0018	7.2e-09	0.0101483	0.0176179	0.5646
rs1075901	17	15943910	T	C	-0.0121	0.0016	1.2e-13	0.0151841	0.016396	0.3544
rs4986044	17	21261560	T	C	-0.0164	0.0016	3.3e-23	0.0143959	0.0168675	0.3934
rs1038088	17	28074563	T	G	-0.0117	0.0016	4.6e-13	0.0480354	0.0168186	0.004289
rs7211567	17	31460899	T	C	-0.0145	0.0021	4.5e-12	-0.0256677	0.0195408	0.189
rs1106908	17	34942595	A	G	-0.0158	0.0016	3.1e-22	-0.0738618	0.016382	6.522e-06
rs4796243	17	35057883	A	G	-0.0124	0.0019	6.1e-11	-0.0221434	0.0177031	0.211
rs8070454	17	38160754	T	C	-0.0098	0.0017	4.2e-09	-0.00618086	0.016773	0.7125
rs16966801	17	39573713	A	G	-0.0156	0.0022	1.1e-12	-0.00742752	0.0204687	0.7167
rs208015	17	46252346	T	C	0.0356	0.0034	1.4e-25	0.0309748	0.0307827	0.3143
rs9299	17	46669430	T	C	0.0121	0.0018	3.6e-11	-0.00439035	0.0171194	0.7976
rs11079849	17	47090785	T	C	-0.0188	0.0019	4.8e-24	0.00369317	0.0185393	0.8421
rs8071182	17	55336155	A	G	0.0133	0.0022	2.1e-09	-0.00965326	0.0222363	0.6642
rs8075273	17	61728881	A	C	-0.0133	0.0018	3.7e-13	0.0334534	0.0181016	0.06459
rs12602912	17	65870073	T	C	0.0176	0.0021	9.9e-18	0.0100493	0.0200375	0.616
rs2619976	17	71754545	T	C	0.0104	0.0018	6.3e-09	0.0305292	0.0167313	0.06805
rs7209235	17	73759552	A	G	-0.0111	0.0019	8e-09	-0.0643252	0.0190231	0.0007211
rs8081039	17	75995829	T	C	0.0233	0.0038	6.1e-10	0.0525573	0.0339132	0.1212
rs12939549	17	78611724	A	G	0.018	0.0016	2.7e-28	0.0348844	0.016357	0.03295
rs7210438	17	79060180	T	C	0.0142	0.002	9.6e-13	0.0252152	0.0192963	0.1913
rs9905991	17	80052073	A	G	0.01	0.0017	8.3e-09	-0.002002	0.0170816	0.9067
rs1608445	18	947954	A	G	-0.0104	0.0018	3.7e-09	0.00461061	0.0163691	0.7782
rs8097544	18	1839564	A	G	-0.02	0.0025	9.3e-16	0.00468899	0.0228914	0.8377
rs12964689	18	21116998	A	G	0.0203	0.0017	5.1e-32	-0.0110388	0.0162826	0.4978
rs1941697	18	31251276	A	G	0.0123	0.0017	1.2e-12	-0.00846408	0.0162384	0.6022
rs1365466	18	36182440	T	C	-0.0137	0.0019	3.3e-13	-0.0118702	0.0187281	0.5262
rs555267	18	40992698	T	G	0.0126	0.0017	6e-13	-0.000499875	0.017883	0.9777
rs954018	18	42598463	A	G	-0.013	0.0018	2.1e-13	0.0258308	0.0176883	0.1442
rs10438964	18	42950629	T	C	-0.0127	0.0019	7.6e-11	-0.0377774	0.0185265	0.04144
rs7239114	18	45921214	A	G	0.0124	0.0017	1.2e-13	0.0205089	0.0170636	0.2294
rs8092503	18	52479487	A	G	-0.0165	0.0019	2.3e-17	-0.0131136	0.019182	0.4942
rs7243357	18	56883319	T	G	0.0194	0.0021	9.1e-20	-0.0232686	0.0215835	0.281
rs2000746	18	57677294	A	G	0.0181	0.002	7e-19	0.013607	0.0198852	0.4938
rs663129	18	57838401	A	G	0.0545	0.0019	1.6e-178	0.00270365	0.0192318	0.8882
rs8094523	18	57878155	A	G	-0.0305	0.0032	4.7e-22	-0.0341115	0.031216	0.2745
rs9675376	18	57969244	A	G	0.035	0.0018	2.7e-82	-0.00816656	0.0181362	0.6525
rs9951893	18	60739250	T	C	-0.0115	0.0017	3.3e-11	-0.0246926	0.0163339	0.1306
rs2012927	18	63297672	A	G	0.0129	0.0017	7.4e-14	0.0178399	0.0170391	0.2951
rs12604935	18	69233570	A	C	-0.011	0.0018	1e-09	-0.00461061	0.0169005	0.785
rs11150911	18	73498528	A	C	0.0133	0.0018	4.7e-13	-0.00816656	0.0178988	0.6482
rs497785	18	76747412	A	G	-0.0233	0.0036	7.6e-11	-0.0398936	0.0354246	0.2601
rs12609744	19	12994140	T	C	-0.0126	0.0019	3.6e-11	-0.00280393	0.0186197	0.8803
rs273504	19	18215247	A	G	-0.0153	0.0018	4.4e-18	0.083599	0.0172535	1.264e-06
rs17724992	19	18454825	A	G	0.0183	0.0019	1e-22	0.0196065	0.0186335	0.2927
rs998732	19	19378671	A	G	0.0171	0.0022	2e-14	-0.0433251	0.0220092	0.04901
rs2304130	19	19789528	A	G	0.0176	0.003	2.9e-09	0.0381173	0.031037	0.2194
rs8102137	19	30296853	T	C	-0.0193	0.0018	1.7e-25	-0.0164343	0.0176211	0.351
rs2866816	19	30683879	T	C	0.0129	0.002	5.6e-11	-0.00904074	0.0183692	0.6226
rs11668301	19	31016196	A	G	0.021	0.0024	1.9e-18	0.0182328	0.0226924	0.4217
rs10408013	19	33963766	T	C	0.0111	0.0018	8e-10	-0.0146062	0.0179535	0.4159
rs29938	19	34311481	T	C	-0.015	0.0017	6.7e-18	-0.00508704	0.0171837	0.7672
rs3826705	19	42637232	T	C	-0.0157	0.0027	6.6e-09	-0.0142003	0.0251875	0.5729
rs2075650	19	45395619	A	G	0.0244	0.0023	1.5e-25	0.0523078	0.024177	0.0305
rs11672660	19	46180184	T	C	-0.034	0.0021	1.7e-60	-0.0727857	0.0212081	0.0005992
rs3810291	19	47569003	A	G	0.0274	0.0018	2.1e-52	-0.0868197	0.0192737	6.651e-06
rs1884389	20	1410582	T	C	-0.0103	0.0017	4e-09	-0.00260339	0.0161074	0.8716
rs1884897	20	6612832	A	G	-0.0194	0.0017	1.3e-30	-0.0121262	0.0167238	0.4684
rs8123881	20	15819495	A	G	-0.0196	0.0024	4.4e-16	0.0211742	0.0241446	0.3805
rs4814512	20	16564210	A	C	0.0133	0.0021	2.3e-10	0.032564	0.0199778	0.1031
rs6138482	20	25059442	T	C	0.0147	0.002	5.8e-13	0.0308201	0.0201483	0.1261
rs6119778	20	30813789	T	C	0.0142	0.0024	2.1e-09	-0.0192848	0.0223633	0.3885
rs2425241	20	35018412	T	C	-0.0197	0.0033	2.7e-09	0.00409162	0.0339599	0.9041
rs2143253	20	41987392	A	G	-0.0188	0.0026	1.1e-12	-0.0379699	0.0247831	0.1255
rs2425857	20	44914134	A	G	0.0116	0.0017	2.8e-11	0.0103534	0.0164822	0.5299
rs6019482	20	47495560	T	C	-0.0178	0.0023	2.8e-14	-0.0419094	0.022558	0.06319
rs17806379	20	51107290	T	C	-0.0258	0.0022	1.5e-30	0.0545618	0.0210705	0.009612
rs1512065	20	53453326	A	G	0.0138	0.0021	5.7e-11	0.00320513	0.0193144	0.8682
rs559267	20	54157497	A	G	-0.0115	0.0017	3e-11	0.00458945	0.017067	0.788
rs2427453	20	61577515	T	C	0.0112	0.0018	2.7e-10	-0.016267	0.0164152	0.3217
rs310618	20	62127121	T	C	-0.0108	0.0018	5.5e-09	-0.0238829	0.0207089	0.2488
rs762147	21	39238610	A	G	-0.0115	0.0019	3.3e-09	0.00955421	0.0186163	0.6078
rs2836961	21	40627020	A	C	-0.0102	0.0017	1.1e-09	-0.00652122	0.0167422	0.6969
rs2838006	21	42653567	T	C	-0.0126	0.0018	5.4e-12	-0.0141001	0.0170229	0.4075
rs427943	21	46570896	A	C	-0.017	0.0017	7.3e-23	-0.00260339	0.0169736	0.8781
rs4820408	22	40604945	T	G	0.0151	0.0017	2.1e-19	-0.0144032	0.0164479	0.3812
rs9615905	22	48875699	T	C	0.011	0.0017	2.7e-10	0.0278852	0.0165771	0.09254

[truncated: 27 more sheets: S11, S12, S13, S14, S15, S16, S17, S18, S19, S20, S21, S22, S23, S24, S25, S26, S27, S28, S29, S30 …]
